# Supplementary material for: CDC20 promotes bone formation via APC/C dependent ubiquitination and degradation of p65
Source: PubMed Central journal article supplement (PMC8419691; doi:10.15252/embr.202152576), 2021-08-12
Supplement: EMBR-22-e52576-s003.pdf [file EMBR-22-e52576-s003.pdf]

## Expanded View Figures

### Figure EV1. Conditional knockout of Cdc20 impairs bone formation and blunts bone regeneration, related to Fig 1.

- A The design strategy of conditional deletion of Cdc20 gene.
- B Representative image of PCR genotypes of indicated mice. *Sp7-Cre;Cdc20<sup>fl/fl</sup>* mice were in experimental groups, *Cdc20<sup>fl/fl</sup>* mice were in control groups.
- C Representative micro-CT images and H&E staining of trabecular bone from the femoral metaphysis of 12-week-old male *Sp7-Cre;Cdc20<sup>fl/fl</sup>* and littermate control mice. Scale bar, 500  $\mu$ m.
- D Histomorphometric analyses of 12-week-old male femurs ( $n = 6$ ).
- E Representative micro-CT images and H&E staining of trabecular bone from the femoral metaphysis of 12-week-old female *Sp7-Cre;Cdc20<sup>fl/fl</sup>* and littermate control mice. Scale bar, 500  $\mu$ m.
- F Histomorphometric analyses of 12-week-old female femurs ( $n = 6$ ).

Data information: Data are displayed as mean  $\pm$  SD and show one representative of  $n \geq 3$  independent experiments with three biological replicates. Statistical significance was calculated by a two-tailed unpaired Student's *t*-test and defined as \* $P < 0.05$ , \*\* $P < 0.01$ .

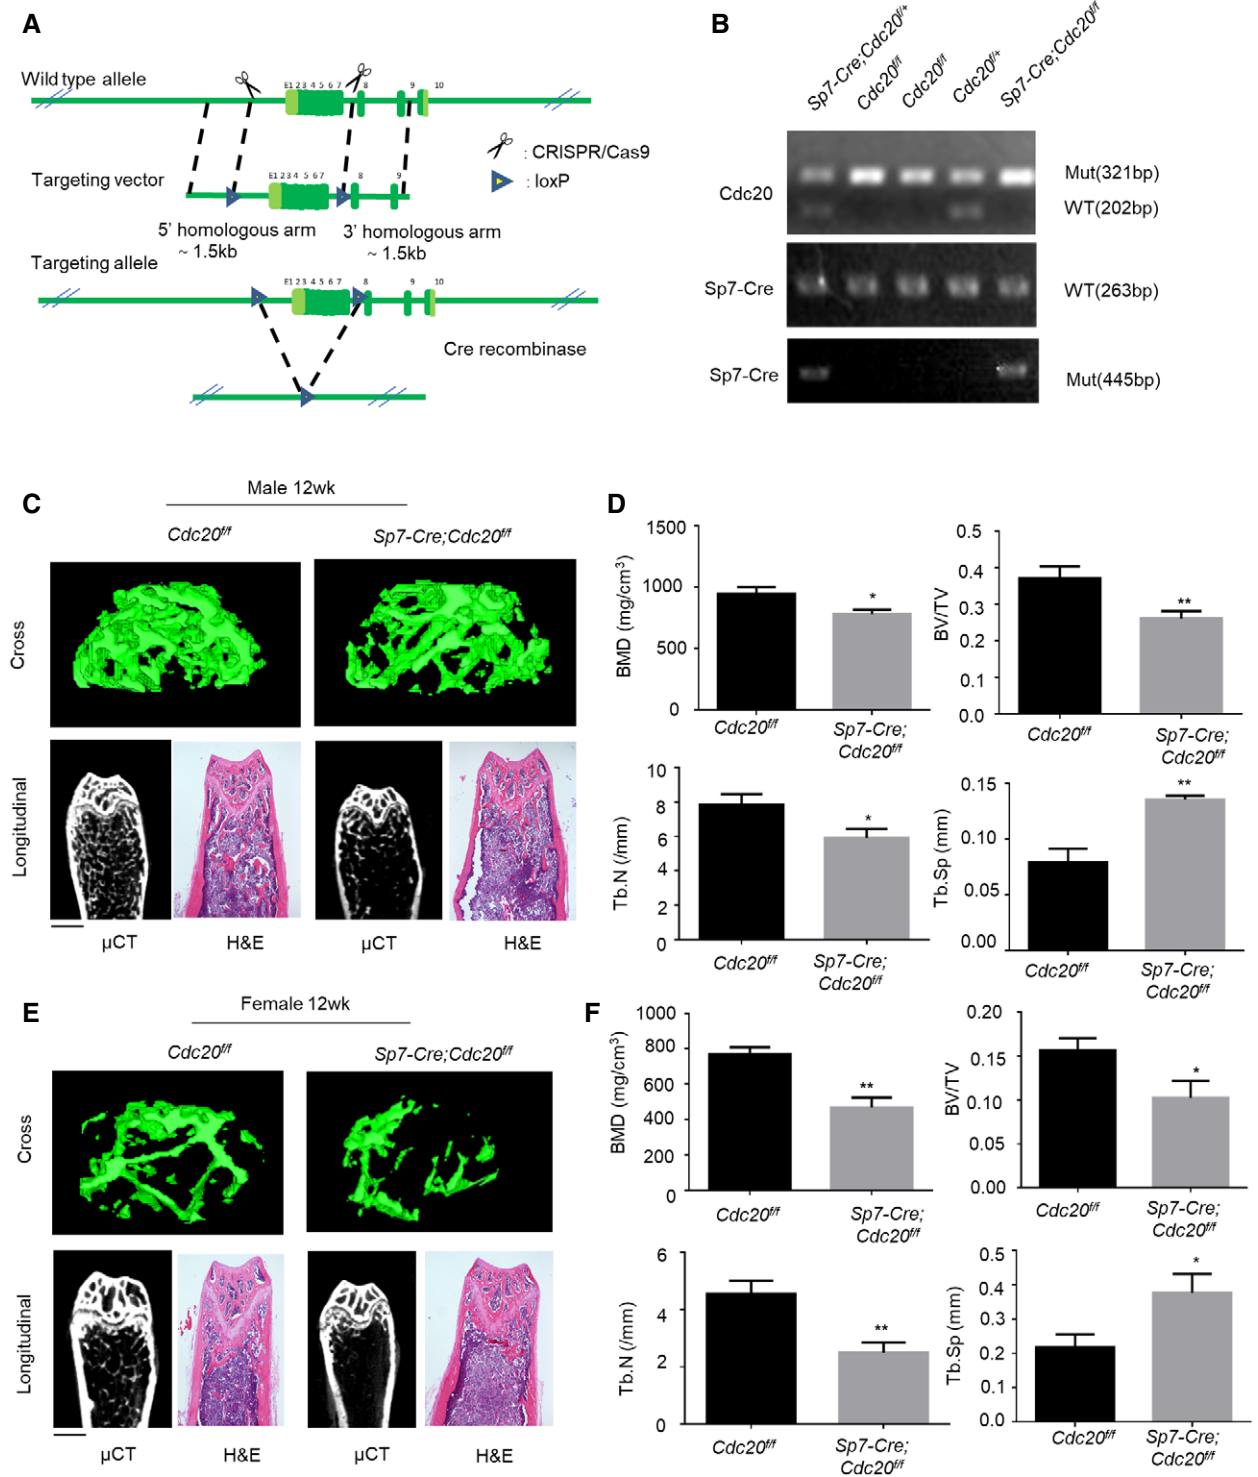

Figure EV1.

**Figure EV2. CDC20 modulates osteogenic differentiation of BMSCs, related to Fig 2.**

- A–D Western blot analyses (A) and qRT–PCR (B–D) of the expression of CDC20 and osteogenic marker RUNX2, OCN. Cells were cultured in osteogenic medium for 7 and 14 days ( $n = 6$ ).
- E, F The knockout efficiency of *Cdc20* (E) and the expression of osteogenic marker *Runx2* (F) in BMSCs of *Sp7-Cre;Cdc20<sup>flf</sup>* and *Cdc20<sup>flf</sup>* mice determined by qRT–PCR ( $n = 5$ ).
- G Representative images of light and fluorescence of lentivirus infected NC and CDC20sh hBMSCs. Scale bar: 500  $\mu\text{m}$ .
- H The knockdown efficiency of *CDC20* in NC and CDC20sh hBMSCs determined by qRT–PCR ( $n = 5$ ).
- I, J The expression of RUNX2 in NC and CDC20sh hBMSCs after 7 days osteogenic differentiation determined by qRT–PCR (I) and Western blot analyses (J) ( $n = 5$ ).
- K Western blot analyses of Myc–CDC20, Myc–CDC20 171–499 fragment (containing WD40 domain), Myc–CDC20 1–170 fragment (lacking WD40 domain) plasmids expression in HEK293T cells.
- L Western blot analyses of the degradation of the substrate Cyclin B1 under the overexpression of truncated fragments of CDC20.

Data information: Data are displayed as mean  $\pm$  SD and show one representative of  $n \geq 3$  independent experiments with three biological replicates. Statistical significance was calculated by a two-tailed unpaired Student's *t*-test or one-way ANOVA followed by a Tukey's post hoc test and defined as \*\*\* $P < 0.001$ .

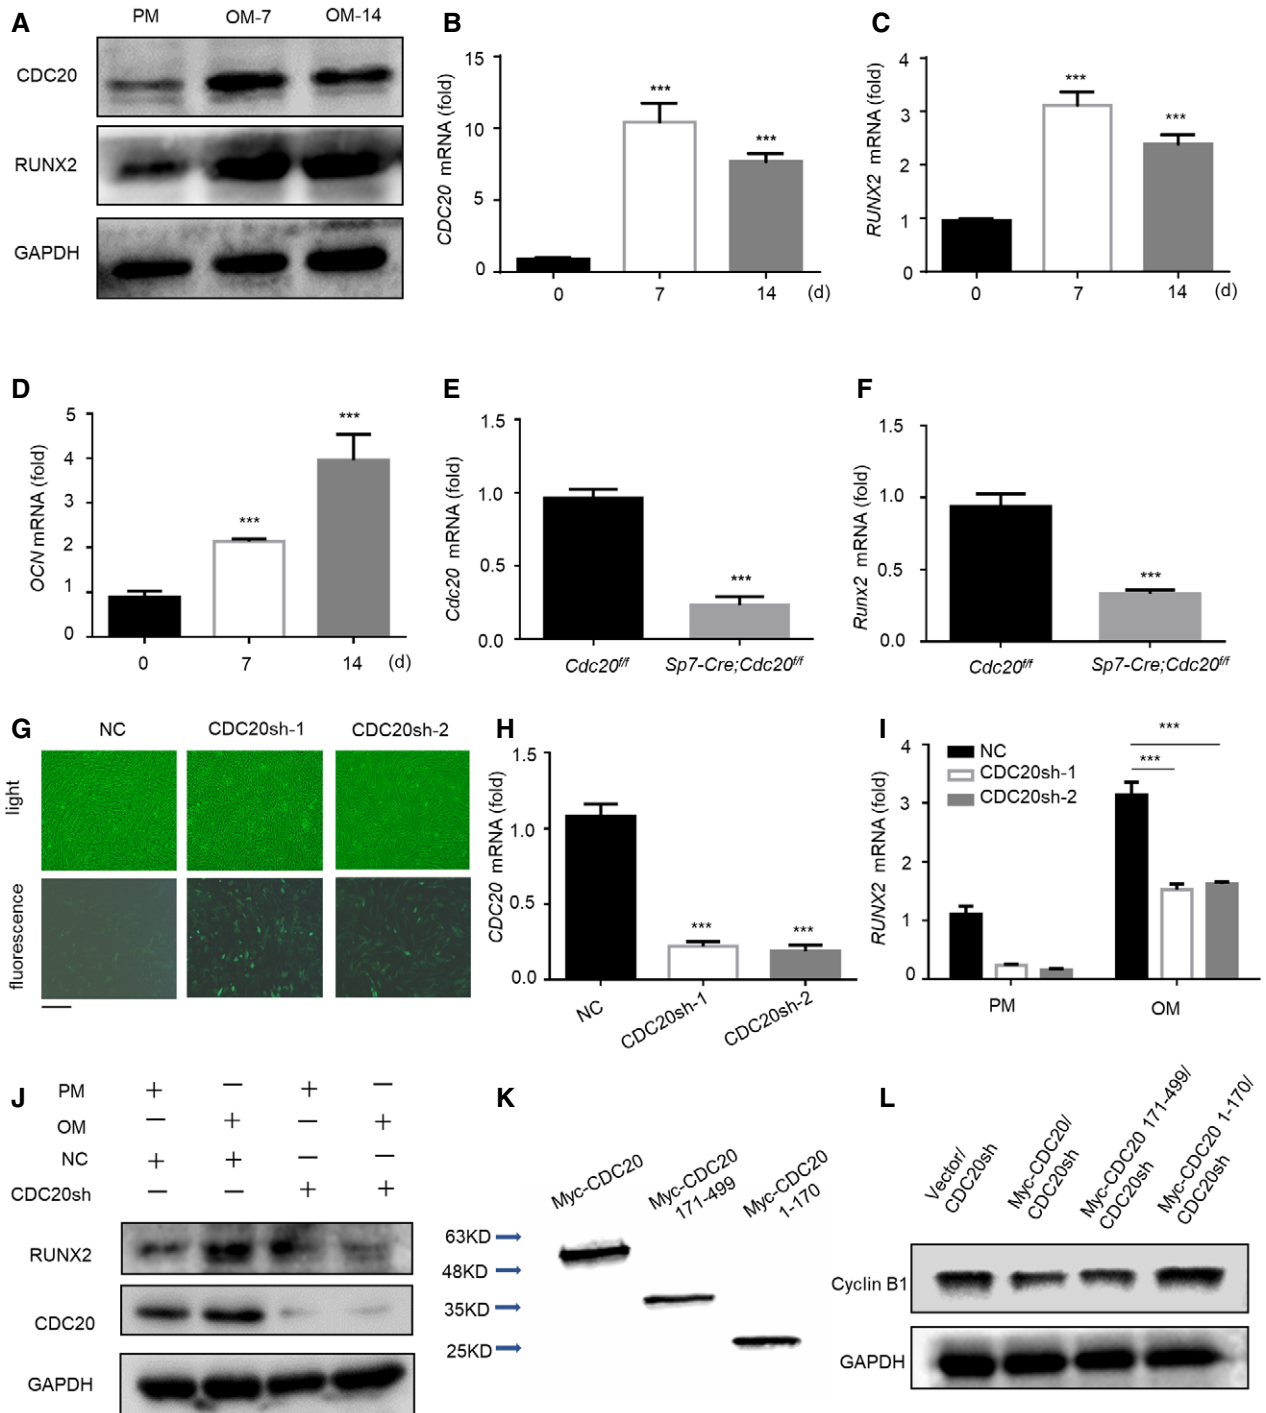

Figure EV2.

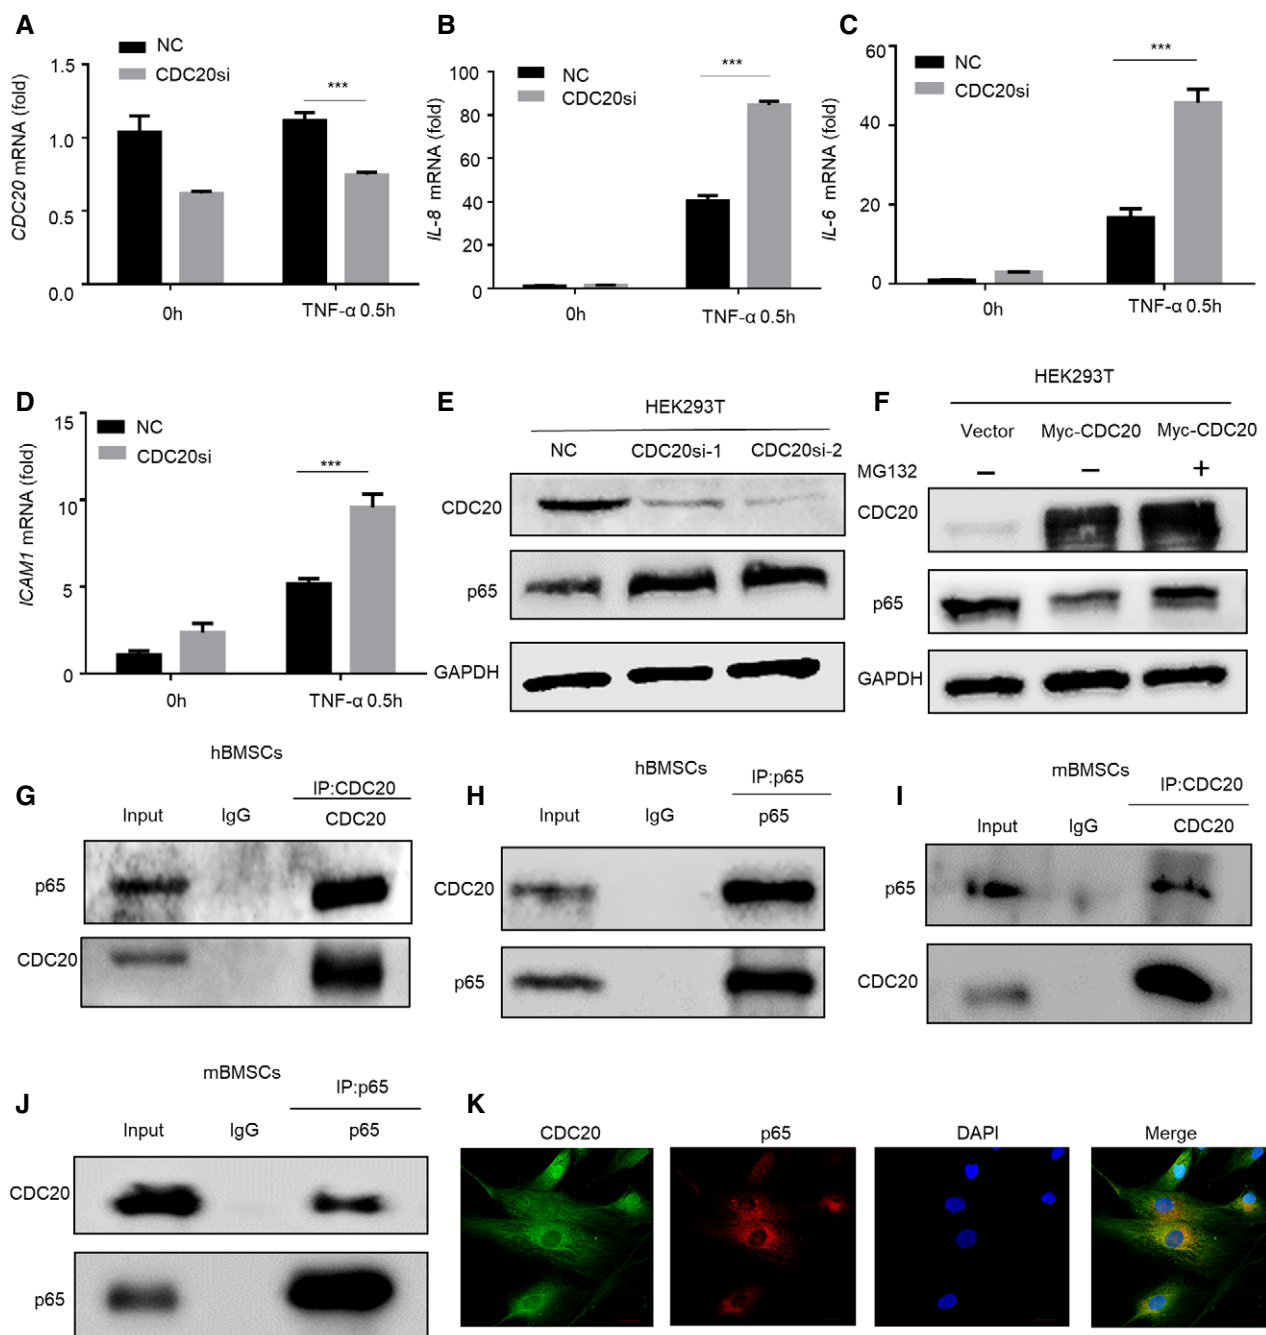

**Figure EV3. CDC20 induces proteasome-dependent degradation of p65 and CDC20 interacts with p65, related to Figs 3 and 4.**

A–D The expression of *CDC20* (A) and NF- $\kappa$ B pathway downstream genes *IL-8*, *IL-6*, and *ICAM1* (B–D) of NC and CDC20si HEK293T cells after TNF- $\alpha$  stimulation determined by qRT-PCR ( $n = 6$ ).

E Western blot analyses of the degradation of endogenous p65 protein in NC and CDC20si HEK293T cells.

F Western blot analyses of the degradation of p65 protein after the overexpression of Myc-CDC20. HEK293T cells were transfected with Vector and Myc-CDC20 plasmids for 36 h, cells were treated with or without 10  $\mu$ M MG132 (the proteasome inhibitor) for 6 h before collected.

G, H Co-immunoprecipitation of endogenous CDC20 with endogenous p65 in hBMSCs.

I, J Co-immunoprecipitation of endogenous CDC20 with endogenous p65 in mBMSCs.

K The co-localization of CDC20 and p65 in hBMSCs. Scale bar: 20  $\mu$ m.

Data information: Data are displayed as mean  $\pm$  SD and show one representative of  $n \geq 3$  independent experiments with three biological replicates. Statistical significance was calculated by one-way ANOVA followed by a Tukey's post hoc test and defined as \*\*\* $P < 0.001$ .

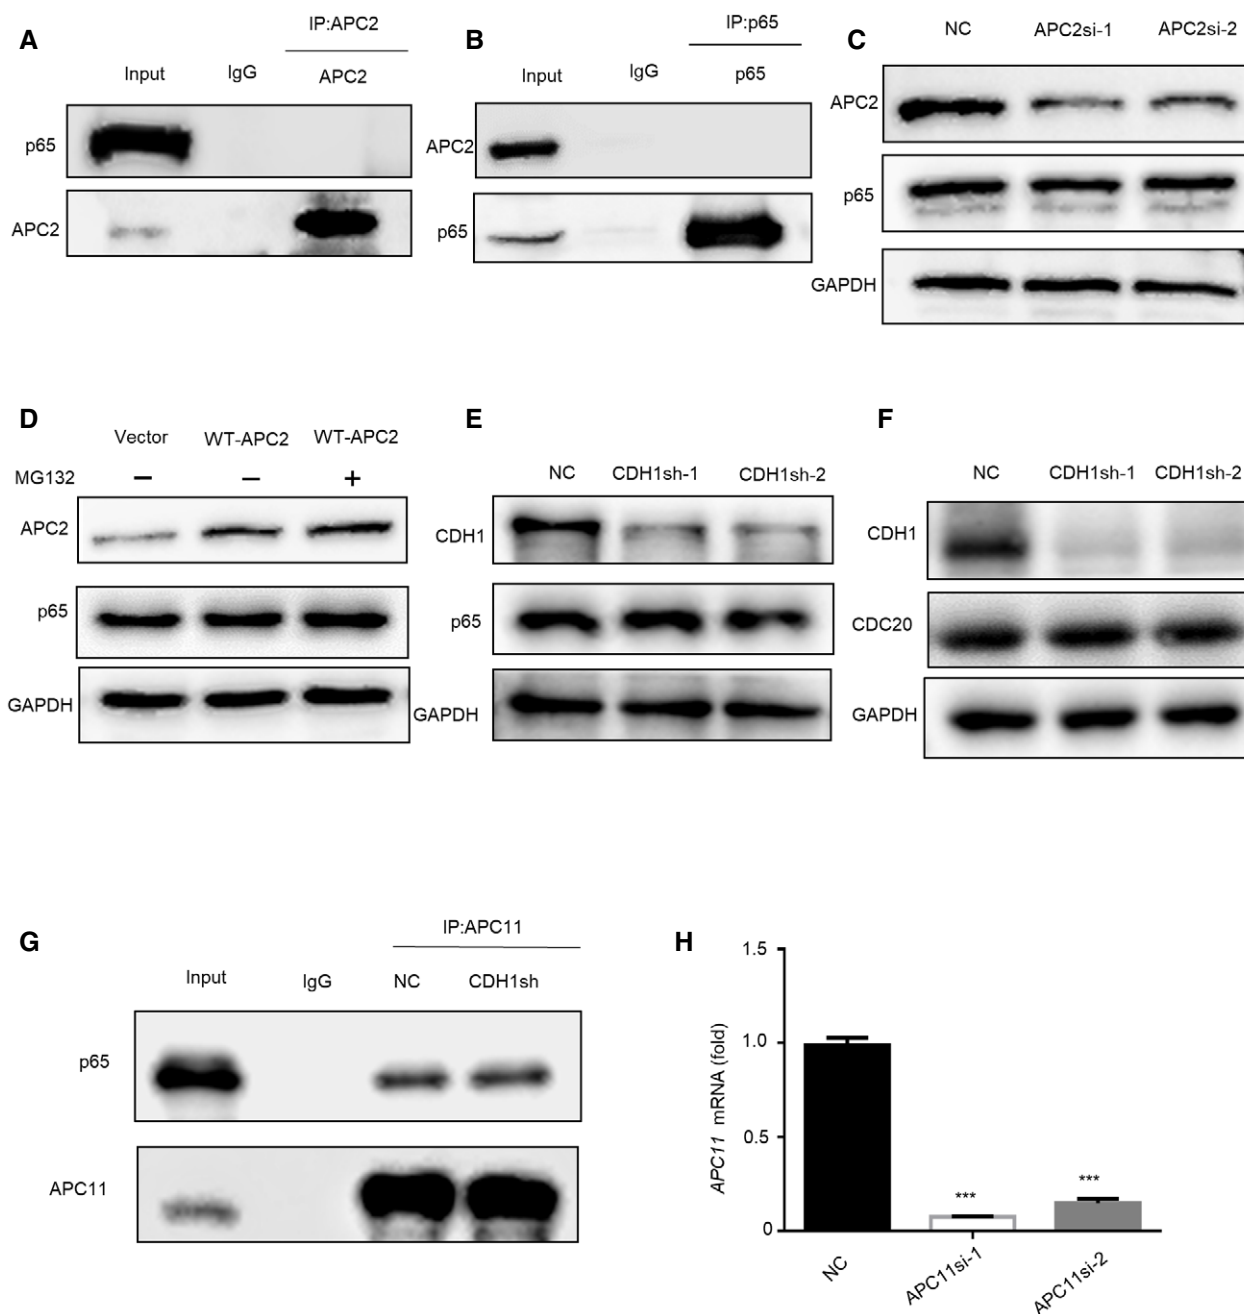

**Figure EV4. CDC20 regulates p65 degradation in an APC11-dependent manner, related to Fig 6.**

A, B No interaction was found in the immunoprecipitation of p65 and APC2 in HEK293T cells.

C, D The expression of p65 remained stable under the knockdown (C) or overexpression (D) of APC2 in HEK293T cells determined by Western blot analyses.

E, F No change of p65 protein (E) and CDC20 protein (F) were seen in NC and CDH1sh HEK293T cells.

G The interaction of APC11 and p65 remained stable in NC and CDH1sh HEK293T cells.

H The knockdown efficiency of APC11 in hBMSCs was determined by qRT-PCR ( $n = 6$ ).

Data information: Data are displayed as mean  $\pm$  SD and show one representative of  $n \geq 3$  independent experiments with three biological replicates. Statistical significance was calculated by one-way ANOVA followed by a Tukey's post hoc test and defined as \*\*\* $P < 0.001$ .

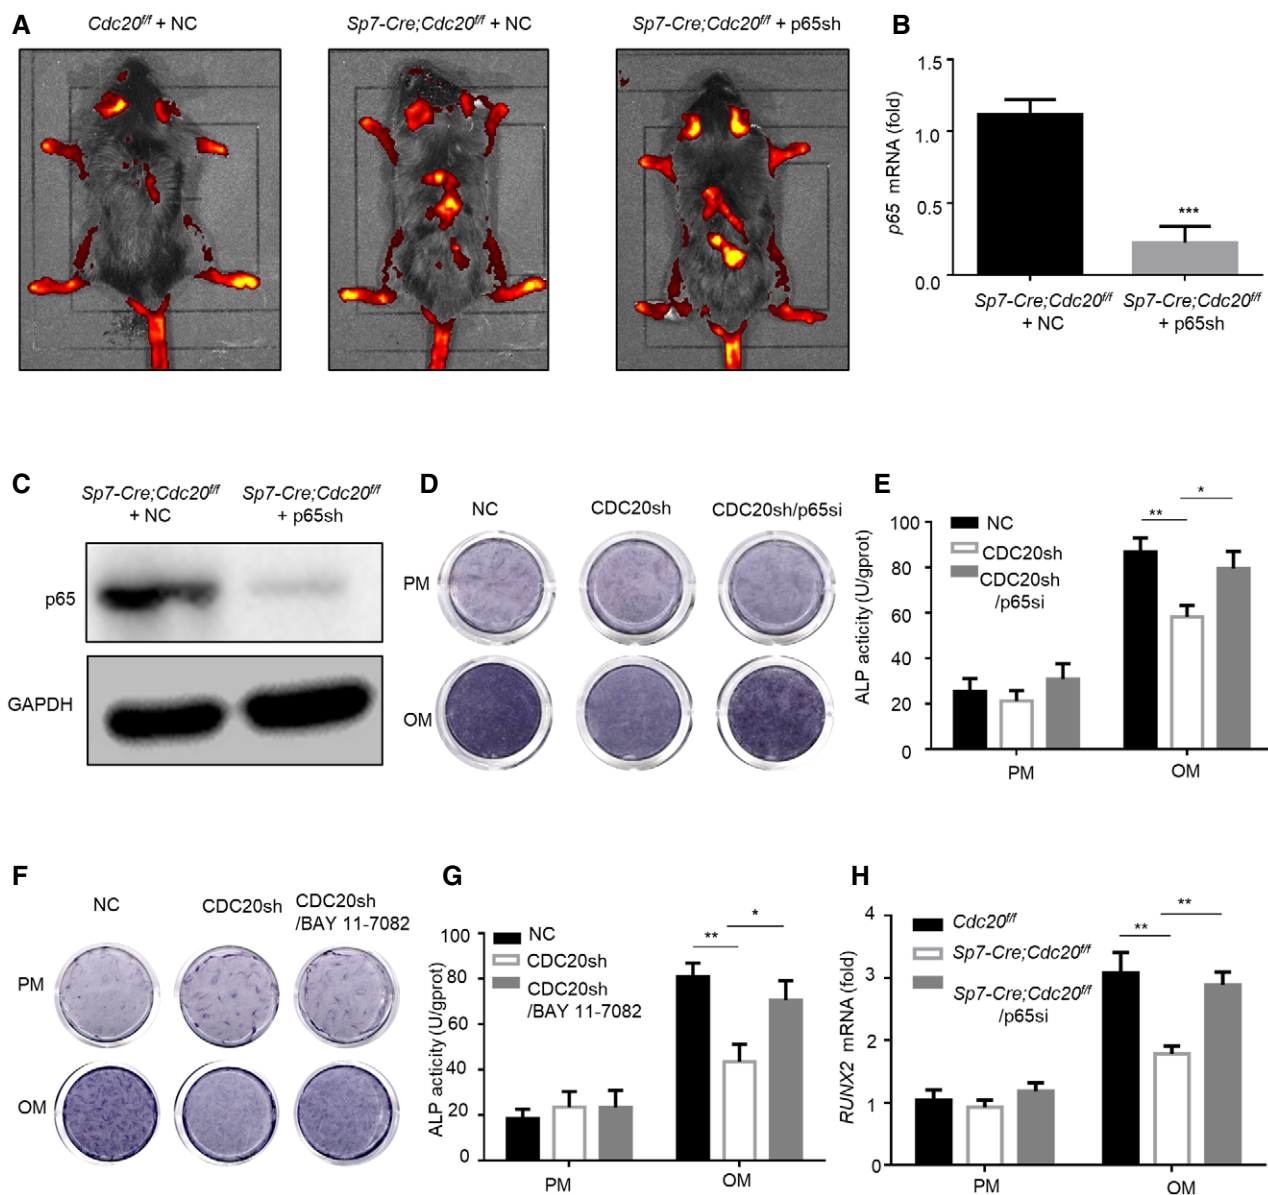

**Figure EV5. CDC20 regulated osteogenic differentiation of BMSCs in a p53-dependent manner, related to Fig 8.**

A Fluorescent staining of lentiviruses injected from tail intravenously.

B, C The efficiency of p53 knockdown determined by qRT-PCR (B) and Western blot (C) of BMSCs in *Sp7-Cre;Cdc20<sup>ff</sup>* mice ( $n = 6$ ).

D, E The ALP staining (D) and ALP quantification (E) of control and CDC20 knockdown hBMSCs after 7 days osteogenic differentiation treated with negative control or p65si RNA ( $n = 5$ ).

F, G The ALP staining (F) and ALP quantification (G) of NC and CDC20sh hBMSCs after 7 days osteogenic differentiation treated with BAY 11-7082 ( $n = 6$ ).

H The expression of *RUNX2* in BMSCs from *Cdc20<sup>ff</sup>* mice and *Sp7-Cre;Cdc20<sup>ff</sup>* mice after 7 days osteogenic differentiation treated with negative control or p65si, determined by qRT-PCR ( $n = 5$ ).

Data information: Data are displayed as mean  $\pm$  SD and show one representative of  $n \geq 3$  independent experiments with three biological replicates. Statistical significance was calculated by one-way ANOVA followed by independent two-tailed Student's *t*-tests or a Tukey's post hoc test and defined as \* $P < 0.05$ , \*\* $P < 0.01$ , \*\*\* $P < 0.001$ .
