# Supplementary material for: CDC20 promotes bone formation via APC/C dependent ubiquitination and degradation of p65
Source: PubMed Central journal article supplement (PMC8419691; doi:10.15252/embr.202152576), 2021-08-12
Supplement: EMBR-22-e52576-s004.pdf [file EMBR-22-e52576-s004.pdf]

# CDC20 promotes bone formation via APC/C dependent ubiquitination and degradation of p65

Yangge Du, Min Zhang, Xuejiao Liu, Zheng Li, Menglong Hu, Yueming Tian, Longwei Lv, Xiao Zhang, Yunsong Liu, Ping Zhang and Yongsheng Zhou

**DOI: 10.15252/embr.202152576**

*Corresponding author(s): Yongsheng Zhou (kqzhouysh@hsc.pku.edu.cn) , Ping Zhang (zhangping332@bjmu.edu.cn)*

---

## Review Timeline:

|                     |             |
|---------------------|-------------|
| Submission Date:    | 31st Jan 21 |
| Editorial Decision: | 3rd Mar 21  |
| Revision Received:  | 26th May 21 |
| Editorial Decision: | 16th Jun 21 |
| Revision Received:  | 23rd Jun 21 |
| Accepted:           | 8th Jul 21  |

---

*Editor: Deniz Senyilmaz Tiebe*

## Transaction Report:

(Note: With the exception of the correction of typographical or spelling errors that could be a source of ambiguity, letters and reports are not edited. Depending on transfer agreements, referee reports obtained elsewhere may or may not be included in this compilation. Referee reports are anonymous unless the Referee chooses to sign their reports.)

Dear Dr. Zhou,

Thank you for the submission of your research manuscript to our journal, which was now seen by three referees, whose reports are copied below.

Referees express interest in the proposed role of CD20 in osteogenesis by promoting APC/C mediated p65 degradation. However, they also raise overlapping important concerns that need to be addressed to consider publication here.

I find the reports informed and constructive, and believe that addressing the concerns raised will significantly strengthen the manuscript. As the reports are below, and I think all points need to be addressed, I will not detail them here.

Given these positive recommendations, we would like to invite you to revise your manuscript with the understanding that the referee concerns (as in their reports) must be fully addressed and their suggestions taken on board. Please address all referee concerns in a complete point-by-point response. Acceptance of the manuscript will depend on a positive outcome of a second round of review. It is EMBO reports policy to allow a single round of revision only and acceptance or rejection of the manuscript will therefore depend on the completeness of your responses included in the next, final version of the manuscript.

We generally allow three months as standard revision time. As a matter of policy, competing manuscripts published during this period will not negatively impact on our assessment of the conceptual advance presented by your study. However, we request that you contact the editor as soon as possible upon publication of any related work, to discuss how to proceed. Should you foresee a problem in meeting this three-month deadline, please let us know in advance and we may be able to grant an extension.

\*\*\* Temporary update to EMBO Press scooping protection policy:

We are aware that many laboratories cannot function at full efficiency during the current COVID-19/SARS-CoV-2 pandemic and have therefore extended our 'scooping protection policy' to cover the period required for a full revision to address the experimental issues highlighted in the editorial decision letter. Please contact the scientific editor handling your manuscript to discuss a revision plan should you need additional time, and also if you see a paper with related content published elsewhere.\*\*\*

**IMPORTANT NOTE:** we perform an initial quality control of all revised manuscripts before re-review. Your manuscript will FAIL this control and the handling will be DELAYED if the following APPLIES:

1. A data availability section providing access to data deposited in public databases is missing (where applicable).
2. Your manuscript contains statistics and error bars based on  $n=2$ . Please use scatter plots in these cases.

You can submit the revision either as a Scientific Report or as a Research Article. For Scientific Reports, the revised manuscript can contain up to 5 main figures and 5 Expanded View figures. If the revision leads to a manuscript with more than 5 main figures it will be published as a Research Article. In this case the Results and Discussion section should be separate. If a Scientific Report is submitted, these sections have to be combined. This will help to shorten the manuscript text by

eliminating some redundancy that is inevitable when discussing the same experiments twice. In either case, all materials and methods should be included in the main manuscript file

Supplementary/additional data: The Expanded View format, which will be displayed in the main HTML of the paper in a collapsible format, has replaced the Supplementary information. You can submit up to 5 images as Expanded View. Please follow the nomenclature Figure EV1, Figure EV2 etc. The figure legend for these should be included in the main manuscript document file in a section called Expanded View Figure Legends after the main Figure Legends section. Additional Supplementary material should be supplied as a single pdf labeled Appendix. The Appendix includes a table of content on the first page with page numbers, all figures and their legends. Please follow the nomenclature Appendix Figure Sx throughout the text and also label the figures according to this nomenclature. For more details please refer to our guide to authors.

Please note that for all articles published beginning 1 July 2020, the EMBO Reports reference style will change to the Harvard style for all article types. Details and examples are provided at <https://www.embopress.org/page/journal/14693178/authorguide#referencesformat>

When submitting your revised manuscript, please carefully review the instructions that follow below. Failure to include requested items will delay the evaluation of your revision.

1) a .docx formatted version of the manuscript text (including legends for main figures, EV figures and tables). Please make sure that the changes are highlighted to be clearly visible.

2) individual production quality figure files as .eps, .tif, .jpg (one file per figure).

3) a .docx formatted letter INCLUDING the reviewers' reports and your detailed point-by-point responses to their comments. As part of the EMBO Press transparent editorial process, the point-by-point response is part of the Review Process File (RPF), which will be published alongside your paper. For more details on our Transparent Editorial Process, please visit our website: <https://www.embopress.org/page/journal/14693178/authorguide#transparentprocess>

You are able to opt out of this by letting the editorial office know ([emboreports@embo.org](mailto:emboreports@embo.org)). If you do opt out, the Review Process File link will point to the following statement: "No Review Process File is available with this article, as the authors have chosen not to make the review process public in this case."

4) a complete author checklist, which you can download from our author guidelines (<http://embor.embopress.org/authorguide>). Please insert information in the checklist that is also reflected in the manuscript. The completed author checklist will also be part of the RPF.

5) Please note that all corresponding authors are required to supply an ORCID ID for their name upon submission of a revised manuscript (<https://orcid.org/>). Please find instructions on how to link your ORCID ID to your account in our manuscript tracking system in our Author guidelines (<http://embor.embopress.org/authorguide>).

6) We replaced Supplementary Information with Expanded View (EV) Figures and Tables that are collapsible/expandable online. A maximum of 5 EV Figures can be typeset. EV Figures should be cited as 'Figure EV1, Figure EV2' etc... in the text and their respective legends should be included in the main text after the legends of regular figures.

- For the figures that you do NOT wish to display as Expanded View figures, they should be

bundled together with their legends in a single PDF file called \*Appendix\*, which should start with a short Table of Content. Appendix figures should be referred to in the main text as: "Appendix Figure S1, Appendix Figure S2" etc. See detailed instructions regarding expanded view here: <<http://embor.embopress.org/authorguide#expandedview>>.

- Additional Tables/Datasets should be labeled and referred to as Table EV1, Dataset EV1, etc. Legends have to be provided in a separate tab in case of .xls files. Alternatively, the legend can be supplied as a separate text file (README) and zipped together with the Table/Dataset file.

7) We would also encourage you to include the source data for figure panels that show essential data.

Numerical data should be provided as individual .xls or .csv files (including a tab describing the data). For blots or microscopy, uncropped images should be submitted (using a zip archive if multiple images need to be supplied for one panel). Additional information on source data and instruction on how to label the files are available <<http://embor.embopress.org/authorguide#sourcedata>>.

8) Our journal encourages inclusion of \*data citations in the reference list\* to directly cite datasets that were re-used and obtained from public databases. Data citations in the article text are distinct from normal bibliographical citations and should directly link to the database records from which the data can be accessed. In the main text, data citations are formatted as follows: "Data ref: Smith et al, 2001" or "Data ref: NCBI Sequence Read Archive PRJNA342805, 2017". In the Reference list, data citations must be labeled with "[DATASET]". A data reference must provide the database name, accession number/identifiers and a resolvable link to the landing page from which the data can be accessed at the end of the reference. Further instructions are available at <<http://embor.embopress.org/authorguide#datacitation>>.

9) Please make sure to include a Data Availability Section before submitting your revision - if it is not applicable, make a statement that no data were deposited in a public database. Primary datasets (and computer code, where appropriate) produced in this study need to be deposited in an appropriate public database (see <<http://embor.embopress.org/authorguide#dataavailability>>).

Please remember to provide a reviewer password if the datasets are not yet public.

The accession numbers and database should be listed in a formal "Data Availability " section (placed after Materials & Method) that follows the model below. Please note that the Data Availability Section is restricted to new primary data that are part of this study.

# Data availability

The datasets (and computer code) produced in this study are available in the following databases:

- RNA-Seq data: Gene Expression Omnibus GSE46843 (<https://www.ncbi.nlm.nih.gov/geo/query/acc.cgi?acc=GSE46843>)
- [data type]: [name of the resource] [accession number/identifier/doi] ([URL or identifiers.org/DATABASE:ACCESSION])

\*\*\* Note - All links should resolve to a page where the data can be accessed. \*\*\*

10) Regarding data quantification, please ensure to specify the name of the statistical test used to generate error bars and P values, the number (n) of independent experiments underlying each data point (not replicate measures of one sample), and the test used to calculate p-values in each figure legend. Discussion of statistical methodology can be reported in the materials and methods section, but figure legends should contain a basic description of n, P and the test applied.

Please note that error bars and statistical comparisons may only be applied to data obtained from at least three independent biological replicates.

Please also include scale bars in all microscopy images.

We would also welcome the submission of cover suggestions, or motifs to be used by our Graphics Illustrator in designing a cover.

I look forward to seeing a revised version of your manuscript when it is ready. Please let me know if you have questions or comments regarding the revision.

Yours sincerely,

Deniz Senyilmaz Tiebe

Deniz Senyilmaz Tiebe, PhD  
Editor  
EMBO Reports

Referee #1:

Yangge Du and collaborators present in vivo and in vitro data demonstrating a novel and important role of CDC20 in bone formation. Genetic ablation of Cdc20 in Osterix-expressing cells reduces bone mass of 6 and 12-week-old conditional knockout (CKO) mice. In vitro, bone marrow mesenchymal stromal cells (BMSCs) lacking CDC20 present reduced expression of the osteogenic transcription factor RUNX2 and reduced capacity to generate alkaline phosphatase (ALP)-expressing osteoblasts. Mechanistically, the authors show that CDC20 forms a complex with APC11 that ubiquitinates and targets p65 NFkB for proteasomal degradation. Their results obtained after pharmacological inhibition of the NFkB pathway (using BAY11-7082) and p65 knockdown (using shRNAs) in CDC20-deficient BMDCs, as well as p65 knockdown in CDC20 knockout mice (using systemic injections of shRNAs against p65) indicate that CDC20 regulates bone formation, at least in part through proteasomal degradation of p65.

This manuscript is of very good quality, with a lot of work overall well executed. However, there are a few important points that must be addressed, in particular to validate the mouse model used in this study. These points are listed below (see "major comments"). Additional minor points should also be considered to further improve the quality of the manuscript (see "minor comments" below).

Major comments:

1- There are important missing verifications and information concerning the materials and methods, notably concerning the mouse model used in the current study. The Sp7-Cre line differs from the

Osx-GFP::Cre (Tet-off) line that is classically used in the bone field. It seems that Sp7-Cre mice have not been previously characterized. No reference and no specific information are provided regarding this novel Cre line. In absence of complete description of the promoter used to drive Cre expression, and proper characterization of this mouse line, we do not know whether the Sp7-cre transgene targets specifically Osx<sup>+</sup> osteoprogenitors (without off-sites effects), and how this line compares to Osx-GFP::Cre (tet-off) animals.

2- Tail vein/systemic injections of lentivirus encoding shRNAs to knockdown gene expression in mice are not commonly performed. Although we understand that lentiviruses were injected during 4 weeks in CDC20 CKO mice, we do not know how much virus was inoculated, and how often. This information must be written in the manuscript. Since lentiviruses are inoculated in a systemic fashion, various "side effects" of p65 knockdown could be induced, and could complicate the interpretation of the rescue experiment. Ideally p65 could be conditionally knocked-out of osteoprogenitors, since floxed p65 mice exist. Alternatively, the authors should provide evidence that mice inoculated with lentiviruses during 4 weeks are healthy, and that apoptosis of liver hepatocytes is not induced in these mice, since whole-body deficiency of p65 leads to massive liver apoptosis and death. p65 expression in the liver of experimental and control animals should be evaluated, and perhaps in other organs as well.

3- Additional controls and time-points should be presented in the manuscript in order to better characterize the skeletal phenotype of the Cdc20 CKO mice. The bone phenotype of Sp7-Cre; +/- (WT) and Sp7-Cre; fl/+ (conditional HETs) must be shown in addition to Cre-negative animals. Since Osterix is also expressed in growth plate chondrocytes, it is important to characterize the growth plate phenotype of the Sp7-Cre; fl/fl (CKO) mice. Part of the bone phenotype shown in 6-week-old mice could result from delayed endochondral bone formation, due to altered cartilage formation. It is important to know if this is the case. Characterization of endochondral bone development in embryos and newborn mice should provide valuable information. It would be interesting and important to provide data on the relative expression of CDC20 and p65 (mRNA and/or protein) in chondrocytes, osteoprogenitors, osteoblasts and osteocytes in wild type and CKO mice, on bone sections.

Minor comments:

1- Histological analyses of the scaffold engrafted subcutaneously in nude mice (Fig. 1J, and 1K) should be further analyzed by in situ hybridization with osteoblast markers (such as type I collagen and/or osteopontin), to support the conclusion that CDC20 knockdown in hBMDCs impairs osteoblast differentiation.

2- Fig 2E, indicates that the holes in tibias of control and CKO have been drilled on opposite sides of the bone. Since the cortical thickness varies depending on the side of the tibia, it is important to generate bone defects at the exact same location for all control and CKO mice. It is also important to specify at which age these defects have been created.

3- Fig. 6F, 3rd lane: there is a large APC11 band, while the legend indicates no HA-APC11 overexpressed in this sample. The legend appears correct since p65 protein is upregulated in this sample. The APC11 blot should show a band in the second lane, not the third lane. This implies that immunostaining of p65 and of APC11 has been done on two unrelated blots. The entire experiment should be done again using the same membrane to detect p65, APC11, CDC20 and GAPDH.

4- Fig. 7C shows robust induction of p65 ubiquitination in vitro in presence of purified CDC20 without APC11. Does this mean that APC11 is not required for CDC20-induced ubiquitination of p65?

5- Fig 7F, middle lane shows a strong downregulation of CDC20 protein expression although no shRNAs against CDC20 are expressed. How do you explain this?

6- The presentation of the results could be slightly reorganized by presenting first the mouse model

and its skeletal phenotype, and then in vitro experiments with BMDCs (currently presented in Fig. 1). Moreover, the presentation of interaction of CDC20 and p65 both in the text and in the figures appears somewhat lengthy and could be shortened. Finally, the results presented in fig. 6I-L could be transferred to figure 8, since they support the conclusion that p65/NFkB signaling plays a role downstream of CDC20 in osteoblast differentiation.

7- The protocol used to generate BMSCs is unclear.

Very minor additional comments:

1- The term "in vivo" page 5, line 108 is not appropriate since it refers to in vitro experiments.

2- Page 6, line 121 the text "decreased ALP staining and activity" could be replaced by "decreased ALP staining and quantification" since the staining actually reflects ALP activity.

3- The term "in vivo" page 13 line 282 may be misleading, since this is not observed in live mice but in cells cultured in vitro. This could be replaced by "in cells".

Referee #2:

The authors describe a novel function of CDC20, a co-activator of the E3 ubiquitin ligase APC/C, in bone remodeling and regeneration. Whereas in vivo data to demonstrate this function were obtained by the generation and analysis of mice with Sp7-Cre-mediated CDC20 inactivation in bone-forming osteoblasts, the majority of experiments were set up to address the molecular bases explaining the deduced function of CDC20 in bone formation. Overall, this is a very complex study with strong and potentially relevant data. There are however several issues that remain to be addressed.

Specific comments:

1) Although the reported results are surely relevant from a basic science perspective, the statement that APC11CDC20 is a novel target for osteoporosis treatment appears too strong. Is it truly realistic to establish an agonist of such a complex cytoplasmatic regulator, whose expression is not restricted to osteoblasts?

2) The authors have to provide more information about their Sp7-Cre model, which apparently has been generated for this specific project. The key question is, if these mice represent a Cre knockin into the Sp7 locus, which might interfere with the endogenous expression of the relevant transcription factor Osterix. If this is the case, the Cdc20f/f mice alone would not be sufficient as a control, and it has to be evaluated if the Sp7-Cre mice display a skeletal phenotype, regardless of their Cdc20 genotype.

3) Since the in vivo findings in Sp7-Cre/Cdc20f/f mice are essentially the basis for the molecular experiments described thereafter, it would be important to strengthen them. In fact, there was no analysis performed to understand the cellular causes of the osteopenia. This could be done by cellular histomorphometry quantifying osteoblast and osteoclast numbers on the femur sections. Alternatively, the authors could measure serum levels of bone formation and resorption biomarkers. As presented, the phenotype description is incomplete.

4) The molecular experiments shown in the second part of the manuscript are overall convincing, although I personally consider the data obtained in BMCSs (now mostly shown as Supplemental Figures) as more relevant than the data obtained in HEK cells. Moreover, although some of the Western blot results are confirmed by quantitative data, many others are not. Since the authors state that all data were collected from at least three independent experiments, it should be

possible to perform quantification and statistical analysis for all presented data.

5) In the last paragraph of the Results section the authors state that "..., lentiviruses were distributed in mice and the expression levels of p65 was knocked down according to qRT-PCR and western blot analyses." While this statement suggests that p65 expression was analyzed *in vivo*, the legend of Figure EV7B/C indicates that these results were obtained in BMSCs. If this means that the expression analysis was performed in *ex vivo* cultures, this has to be clearly stated.

6) Given the complexity of their findings, the authors should think about providing a schematic presentation to illustrate their conclusions.

Referee #3:

In this manuscript, Du et al. report a positive regulation of osteogenesis by the APC/C(Cdc20) ubiquitin E3 ligase complex through modulating p65/RelA stability. The authors observed a positive correlation between Cdc20 expression and osteogenesis using both *in vitro* BMSC culture/differentiation models and an *in vivo* conditional Cdc20 knockout mouse model. There is a decreased bone mass found in Cdc20-depleted animals. The authors then sought to define the underlying mechanism, they found p65 was upregulated in Cdc20-deficient BMSCs, hence hypothesized p65 as an APC(Cdc20) ubiquitin substrate. They provided evidence that p65 bound to Cdc20 and that Cdc20 facilitates p65 ubiquitination. To assess the role of p65 in Cdc20-mediated osteogenesis, the authors delivered shp65 lentivirus into the mice and were able to observe a rescued phenotype. This is an interesting study demonstrating a novel role of Cdc20 in osteogenesis. However, the data in their current form are quite preliminary, hence a major revision is recommended to provide strong evidence to support the conclusions. Below are specific comments that should be addressed prior to being considered for publication in EMBO Reports.

1. Cdc20 is essential for M->G1 transition, complete loss of Cdc20 arrests cell cycle in M phase and eventually causes cell death. Can the authors comment on whether the phenotypes observed are at least in part due to decreased osteoblast numbers upon *Osx/Sp7*-driven deletion of Cdc20?
2. Fig. 1H-I, can the authors comment on why the Cdc20 WD40 domain was able to rescue the decreased ALP activity upon Cdc20 loss?
3. Fig. 2, Did the authors perform whole-mount skeleton staining of control and *Sp7-cre;Cdc20(f/f)* mice?
4. Fig. 2, Have the authors tried co-staining Cdc20, p65 and an osteoblast marker using immunohistochemistry?
5. Fig. 3, Did the authors check p-p65 levels in conditions where Cdc20 is depleted?
6. Fig. 3, In siCdc20 cells, was p65 mRNA affected as well?
7. Fig. 3 and 4, Why did the authors choose to focus on the p65/NF- $\kappa$ B pathway in this study? Are other NF- $\kappa$ B pathway proteins found increased upon Cdc20 deletion or interacted with Cdc20?
8. Fig. 6, APC2 is required for the integrity of APC/C complex, did the authors suggest in this study an APC2-absent but APC11-present APC/C subcomplex to catalyze p65 ubiquitination? The authors should examine known APC(Cdc20) substrates to demonstrate an effective depletion of APC2, APC11, and Cdh1.
9. Fig. EV5, was Cdc20 upregulated when knocking down Cdh1?
10. Fig. 7C, bacterially expressed and purified GST-Cdc20 and GST-APC11 are APC/C-free, the authors need to explain why APC-free GST-Cdc20 and GST-APC11 promote the ubiquitination of p65 *in vitro*.

1 **Response to Editor and Reviewer**

2

3 Ms. Ref. No.: EMBOR-2021-52576

4 Title: CDC20 regulates bone formation via APC/C dependent ubiquitination and  
5 degradation of p65

6

7 Dear Prof. Deniz Senyilmaz Tiebe,

8 We would like to express our sincere thanks to the editor and reviewers for the critical  
9 comments and insightful suggestions concerning our manuscript. We found the  
10 reviewers' comments to be very helpful and of great value for improving the quality  
11 of our manuscript and we have now made a thorough revision of the paper based on  
12 new experimental evidence. All the changes are highlighted in manuscript and a  
13 detailed point-to-point response to the editor and reviewers were provided. We hope  
14 that our revised manuscript and supporting information will meet the high standard of  
15 *EMBO reports*.

16

17 **[Responses]**

18 Referee #1:

19 Yangge Du and collaborators present in vivo and in vitro data demonstrating a novel  
20 and important role of CDC20 in bone formation. Genetic ablation of Cdc20 in  
21 Osterix-expressing cells reduces bone mass of 6 and 12-week-old conditional  
22 knockout (CKO) mice. In vitro, bone marrow mesenchymal stromal cells (BMSCs)  
23 lacking CDC20 present reduced expression of the osteogenic transcription factor  
24 RUNX2 and reduced capacity to generate alkaline phosphatase (ALP)-expressing

25 osteoblasts. Mechanistically, the authors show that CDC20 forms a complex with  
26 APC11 that ubiquitinates and targets p65 NFkB for proteasomal degradation. Their  
27 results obtained after pharmacological inhibition of the NFkB pathway (using  
28 BAY11-7082) and p65 knockdown (using shRNAs) in CDC20-deficient BMDCs, as  
29 well as p65 knockdown in CDC20 knockout mice (using systemic injections of  
30 shRNAs against p65) indicate that CDC20 regulates bone formation, at least in part  
31 through proteasomal degradation of p65.

32

33 This manuscript is of very good quality, with a lot of work overall well executed.  
34 However, there are a few important points that must be addressed, in particular to  
35 validate the mouse model used in this study. These points are listed below (see "major  
36 comments"). Additional minor points should also be considered to further improve the  
37 quality of the manuscript (see "minor comments" below).

38

39 Major comments:

40 1- There are important missing verifications and information concerning the materials  
41 and methods, notably concerning the mouse model used in the current study. The  
42 Sp7-Cre line differs from the Osx-GFP::Cre (Tet-off) line that is classically used in  
43 the bone field. It seems that Sp7-Cre mice have not been previously characterized. No  
44 reference and no specific information are provided regarding this novel Cre line. In  
45 absence of complete description of the promoter used to drive Cre expression, and  
46 proper characterization of this mouse line, we do not know whether the Sp7-cre

47 transgene targets specifically *Osx*+ osteoprogenitors (without off-sites effects), and  
48 how this line compares to *Osx*-GFP::Cre (tet-off) animals.

49 **Response:** Thanks for the constructive points. Osterix (*Osx*, *Sp7*) is a specific  
50 transcription factor of osteoprogenitors and we generated *Sp7-Cre;Cdc20<sup>fl/fl</sup>* mice to  
51 examine the role of CDC20 during osteoprogenitors differentiation and bone  
52 formation. We have added the description about the mouse model in the methods and  
53 materials in manuscript in page 23, line 493 as follows.

54 “*Cdc20<sup>fl/fl</sup>* and *Sp7-Cre;Cdc20<sup>fl/fl</sup>* mice were generated by Biocytogen Co., Ltd. (Beijing,  
55 China) using CRISPR/Cas9 based EGE system. Briefly, single guide RNAs (sgRNAs)  
56 targeting the upstream of exon1 and the downstream of exon7 of *Cdc20*, respectively,  
57 were designed using the CRISPR design tool (<http://www.sanger.ac.uk/htgt/wge/>).  
58 The candidate sgRNAs were screened for on-target activity using the UCA™  
59 CRISPR efficiency evaluation kit (Biocytogen Co., Ltd., Beijing, China), and two  
60 sgRNAs with high specificity and on-target activity were selected. The targeting  
61 vector that contains the genomic DNA spanning exon1-7 of mouse *Cdc20* flanked by  
62 two loxP sites and the homology arms at the 5' and 3' regions were constructed as  
63 well. The targeting vector, the in vitro-synthesized sgRNAs and Cas9 mRNA were  
64 co-injected into C57BL/6N mouse zygotes. After injection, the surviving 2-cell-stage  
65 zygotes were transplanted into the KM albino pseudopregnant females. The founder  
66 mice bearing the floxed *Cdc20* allele were determined by PCR amplification and  
67 DNA sequencing. Heterozygous *Cdc20<sup>fl/+</sup>* mice were obtained by crossing the founder  
68 mice and the wild type C57BL/6N mice. The genotype of F1 heterozygous *Cdc20<sup>fl/+</sup>*

69 mice was confirmed by PCR amplification, DNA sequencing and Southern blot  
70 analysis. *Sp7-Cre* mice were generated from Beijing Biocytogen Co., Ltd. To avoid  
71 disrupting *Sp7* expression, iCre will be inserted between the coding sequence of  
72 exon2 and 3'UTR. 2A will be used to achieve the expression of *Sp7* and iCre at the  
73 same time and level. To avoid disrupting poly (A) signal of *Sp7* and promoter region  
74 of the downstream gene *Aaas*, *Neo* cassette flanked by *frt* sites will be inserted within  
75 the non-conserved region of intron. Genotyping primers: Osx-iCre-WT-F  
76 TACCAGAAGCGACCAC-TTGAGC; iCre-Mut-R,  
77 GCACACAGACAGGAGCATCTTC. Primers were showed in Table3. The detailed  
78 information of the iB-Sp7-iCre mice was shown on this website:  
79 <https://biocytogen.com/products/cre-mouse-rat-models/b-sp7-osx-icre-mice/>. This  
80 Sp7-Cre (Osx-Cre) mouse model has been used to examine the effects of specific  
81 gene loss in osteoblast progenitor cells on bone development (Chen *et al*, 2021; Jin *et*  
82 *al*, 2017). The application of this mouse model largely verifies that the Sp7-Cre  
83 transgene is able to specifically target Osx<sup>+</sup> osteoprogenitors.” The process mentioned  
84 was shown in Fig EV1A. The genotypes of transgenic mice were shown in Fig EV1B.  
85 The *Cdc20<sup>ff</sup>* mice were in control groups, while *Sp7-Cre;Cdc20<sup>ff</sup>* in experimental  
86 groups. As for Osx-GFP::*Cre* (tet-off) model, the description is on this website:  
87 <https://www.jax.org/strain/006361>. Cre-mediated recombination in these mice is  
88 under the control of doxycycline. Thus, in the absence of doxycycline, EGFP-Cre  
89 fusion protein expression is restricted in osteoblast lineage. A Sp7-tTA,  
90 tetO-EGFP/Cre mouse model was generated by using the BAC of RP23-399N14

91 (204kb) in 2006. Since the BAC contains some other genes such as *Aaas*, *Myg1*,  
 92 *Espl1* (except for *Sp7*), it results in a few potential risks of unexpected insertion of  
 93 those genes, as well as the unclear position of the inserted BAC. While our strategy is  
 94 to insert the Cre in a specific gene position to avoid generating the other unexpected  
 95 transgene mice. Besides, the mouse model used in this research was lack of  
 96 doxycycline regulation. The Cre recombinase-mediated removal of exon1-7 is  
 97 expected to lead a translation termination of *Cdc20*. The two mouse models are  
 98 available to conditional knockout specific gene targeting osteoprogenitors.



99

100 **Figure EV1A, B The manufacture and verification of conditional knockout**  
 101 **mouse.**

102 (EV1A) The design strategy of conditional deletion of *Cdc20* gene. (EV1B) Representative image  
 103 of PCR genotypes of indicated mice. *Sp7-Cre;Cdc20<sup>fl/fl</sup>* mice were in experimental groups, *Cdc20<sup>fl/fl</sup>*  
 104 mice were in control groups.

105

106 2- Tail vein/systemic injections of lentivirus encoding shRNAs to knockdown gene  
 107 expression in mice are not commonly performed. Although we understand that

108 lentiviruses were injected during 4 weeks in CDC20 CKO mice, we do not know how  
109 much virus was inoculated, and how often. This information must be written in the  
110 manuscript. Since lentiviruses are inoculated in a systemic fashion, various "side  
111 effects" of p65 knockdown could be induced, and could complicate the interpretation  
112 of the rescue experiment. Ideally p65 could be conditionally knocked-out of  
113 osteoprogenitors, since floxed p65 mice exist. Alternatively, the authors should  
114 provide evidence that mice inoculated with lentiviruses during 4 weeks are healthy,  
115 and that apoptosis of liver hepatocytes is not induced in these mice, since whole-body  
116 deficiency of p65 leads to massive liver apoptosis and death. p65 expression in the  
117 liver of experimental and control animals should be evaluated, and perhaps in other  
118 organs as well.

119 **Response:** Thanks for notification. Admittedly, injections of lentivirus are not the best  
120 way, however, it can provide evidence in addition to our cellular results. The detailed  
121 information was added in the manuscript page 25, line 546 as follows.

122 “For p65 lentivirus injections,  $8 \times 10^8$  TU/ml lentiviruses 100 $\mu$ l every two weeks were  
123 injected for twice via the tail vein. Four weeks later, the mice were sacrificed.” We  
124 captured the pictures of the gross appearance of NC and p65 knockdown mice and  
125 compared the body weight. The results showed that the NC and p65sh mice were  
126 healthy, and there were no significant differences in the gross appearance and body  
127 weight (Appendix Fig S7A, B). The knockdown efficiency of p65 in the liver of NC  
128 and p65sh mice was determined by western blot assay (Appendix Fig S7C). Then we  
129 tried to clarify the conditions of livers after lentivirus injection. According to

130 Appendix Fig S7D, there were no significant differences in H&E staining and  
131 TUNEL staining, suggesting that apoptosis was not induced in p65sh mice. Some  
132 researchers also used lentivirus injection to knockdown specific gene in the systemic  
133 way (Krishnamachary *et al*, 2009; Luk *et al*, 2020).



134  
135 **Appendix Fig S7A-D No significant adverse effects were found in tail vein**  
136 **injection of p65sh mice and the efficiency of p65 knockdown in liver.**

137 (S7A, B) The appearance and body weight of NC and p65sh lentivirus injected mice. Scale bar,  
138 1cm. Results are shown as mean  $\pm$  SD; (n=5); *ns*, *not significant*. (S7C) Western blot of p65  
139 knockdown in the liver of NC and p65sh mice. (S7D) The H&E staining and TUNEL staining in  
140 the liver of NC and p65sh mice. Scale bar: 50 $\mu$ m.

141

142 3- Additional controls and time-points should be presented in the manuscript in order  
143 to better characterize the skeletal phenotype of the Cdc20 CKO mice. The bone  
144 phenotype of Sp7-Cre; +/+ (WT) and Sp7-Cre; fl/+ (conditional HETs) must be  
145 shown in addition to Cre-negative animals. Since Osterix is also expressed in growth  
146 plate chondrocytes, it is important to characterize the growth plate phenotype of the  
147 Sp7-Cre; fl/fl (CKO) mice. Part of the bone phenotype shown in 6-week-old mice  
148 could result from delayed endochondral bone formation, due to altered cartilage  
149 formation. It is important to know if this is the case. Characterization of endochondral  
150 bone development in embryos and newborn mice should provide valuable information.  
151 It would be interesting and important to provide data on the relative expression of  
152 CDC20 and p65 (mRNA and/or protein) in chondrocytes, osteoprogenitors,  
153 osteoblasts and osteocytes in wild type and CKO mice, on bone sections.

154 **Response:** Thanks for the important points. Following the referee's suggestion, we  
155 investigated the skeletal phenotypes of the following groups including *Sp7-Cre*,  
156 *Cdc20<sup>ff</sup>*, *Sp7-Cre;Cdc20<sup>fl/+</sup>* and *Sp7-Cre;Cdc20<sup>ff</sup>*. Micro-CT analyses of the distal  
157 femur metaphysis of *Sp7-Cre;Cdc20<sup>ff</sup>* mice showed an impairment in trabecular bone  
158 micro-architecture compared to other controls. There were no significant differences  
159 among *Sp7-Cre*, *Cdc20<sup>ff</sup>*, *Sp7-Cre;Cdc20<sup>fl/+</sup>* phenotypes (Appendix Fig S1A). The  
160 BMD and BV/TV parameters in *Sp7-Cre;Cdc20<sup>ff</sup>* 6-week-old mice were greatly  
161 lower than their littermates. *Sp7-Cre;Cdc20<sup>ff</sup>* mice also had decreased Tb.N and  
162 increased Tb.Sp while there were no significant differences among other control

163 groups (Appendix Fig S1B-E). The identification of *Sp7-Cre*, *Cdc20<sup>ff</sup>*,  
 164 *Sp7-Cre;Cdc20<sup>ff/+</sup>* and *Sp7-Cre;Cdc20<sup>ff/ff</sup>* genotypes were shown (Appendix Fig S1F).



165

166 **Appendix Fig S1A-F. Conditional knockout of Cdc20 impairs bone formation.**

167 (S1A) Representative micro-CT images of trabecular bone from the femoral metaphysis of

168 6-week-old *Sp7-Cre*, *Cdc20<sup>ff</sup>*, *Sp7-Cre;Cdc20<sup>ff/+</sup>* and *Sp7-Cre;Cdc20<sup>ff/ff</sup>* mice. Scale bar, 500  $\mu$ m.

169 (S1B-E) Histomorphometric analyses of 6-week-old femurs. Results are shown as mean  $\pm$  SD;

170 (n=3); ns, not significant, \*\* $p < 0.01$ , \*\*\* $p < 0.001$ . (S1F) Representative image of PCR genotypes  
171 of *Sp7-Cre*, *Cdc20<sup>ff</sup>*, *Sp7-Cre;Cdc20<sup>ff/+</sup>* and *Sp7-Cre;Cdc20<sup>ff/ff</sup>* mice.

172 The growth plate phenotypes of 6-week-old mice were conducted to Goldner's  
173 trichrome staining and the lengths of growth plates were evaluated through ImageJ  
174 software. The results showed that there were no significant differences between the  
175 lengths of growth plates of *Cdc20<sup>ff/ff</sup>* and *Sp7-Cre;Cdc20<sup>ff/ff</sup>* mice (Appendix Fig S2A,  
176 B). As for characterization of endochondral bone development, we collected the  
177 femurs and tibiae of embryonic day 19 (E19), postnatal day 1 (P1) and day 4 (P4)  
178 mice and evaluated using H&E staining and Safranin-O-Fast Green staining. There  
179 were no discernable differences among the endochondral bone development in  
180 embryos and newborn mice (Appendix Fig S2C, D).

Fig S2A



Fig S2B



Fig S2C



Fig S2D



181

182 **Appendix Fig S2A-D The phenotypes of growth plates and endochondral bone**  
183 **development.**

184 (S2A) Representative Goldner's trichrome staining of chondrocytes from the femoral metaphysis  
185 of 6-week-old *Cdc20<sup>ff</sup>* and *Sp7-Cre;Cdc20<sup>ff</sup>* mice. Scale bar, 200  $\mu$ m. (S2B) Statistical analyses of  
186 growth plate height of 6-week-old mice femurs. Results are shown as mean  $\pm$  SD; (n=6); *ns*, *not*  
187 *significant*. (S2C, D) Representative H&E staining and Safranin-O-Fast Green staining of femurs  
188 and tibia of embryonic day 19 (E19), postnatal day 1 (P1) and day 4 (P4) of *Cdc20<sup>ff</sup>* and  
189 *Sp7-Cre;Cdc20<sup>ff</sup>* mice. Scale bar, 200  $\mu$ m.

190 Using immunofluorescence methods, we found the co-localization of CDC20 and p65  
191 on bone sections (Appendix Fig S4E).



192

### 193 **Appendix Fig S4E The co-localization of CDC20 and p65 on bone sections**

194 The co-localization of CDC20 and p65 on bone sections of mice. Scale bar, 50  $\mu$ m.

195 During the osteoblast differentiation, BMSCs, osteoblasts and the precursor cells  
196 could secrete transcription factors to form the bone extracellular matrix. And the  
197 osteoprogenitors, osteoblasts, and osteocytes are all differentiated from BMSCs  
198 (Komori, 2006). Therefore, it is hard to distinguish these types using specific markers  
199 or particular morphology, and we used the markers osteocalcin (OCN), Runt-related  
200 transcription factor 2 (RUNX2) to represent them. In conditional knockout mice, the  
201 expression of CDC20, RUNX2 and OCN decreased, while p65 expression increased  
202 (Appendix Fig S3F). As for chondrocytes, we used Collagen Type II(COL-2) to

203 characterize it. The results showed that the expression of COL-2 and CDC20 were  
204 stable in the cartilage of *Cdc20<sup>ff</sup>* and *Sp7-Cre;Cdc20<sup>ff</sup>* mice (Appendix Fig S4F).



205

206 **Appendix Fig S3F Immunofluorescence of relative expression of CDC20, p65,**  
207 **OCN, RUNX2 on bone sections**

208 Immunofluorescence of relative expression of CDC20, p65, OCN, RUNX2 on bone sections  
209 of *Cdc20<sup>ff</sup>* and *Sp7-Cre;Cdc20<sup>ff</sup>* mice. Scale bar, 20  $\mu$ m.



210

211 **Appendix Fig S4F Immunofluorescence of relative expression of COL2 and**  
212 **CDC20 on bone sections**

213 Immunofluorescence of relative expression of COL2 and CDC20 on bone sections of *Cdc20<sup>ff</sup>* and  
214 *Sp7-Cre;Cdc20<sup>ff</sup>* mice. Scale bar, 20  $\mu$ m.

215

216 Minor comments:

217 1- Histological analyses of the scaffold engrafted subcutaneously in nude mice (Fig.  
218 1J, and 1K) should be further analyzed by in situ hybridization with osteoblast  
219 markers (such as Collagen Type I and/or osteopontin), to support the conclusion that  
220 CDC20 knockdown in hBMDCs impairs osteoblast differentiation

221 **Response:** Thanks for reminding. As suggested, we aimed to figure out the relative  
222 mRNA and/ or protein levels of osteoblast markers, and we used the  
223 Immunohistochemistry method. The results showed that the expression of osteocalcin  
224 (OCN) and osteopontin (OPN) decreased in CDC20sh scaffold, suggesting that  
225 knockdown of CDC20 in hBMSCs impaired osteoprogenitor differentiation. The  
226 results were shown in Appendix Fig S2F. The description was added in the manuscript  
227 page 9 line 197 as follows.

228 “The expression of osteoblast markers osteocalcin (OCN) and osteopontin (OPN)  
229 decreased in CDC20sh scaffold using IHC staining (Appendix Fig S2F). These results  
230 showed that knockdown of CDC20 impaired osteogenic differentiation of BMSCs.”

Fig S2F



231

232 **Appendix Fig S2F. The OCN and OPN expression in NC and CDC20sh scaffold.**

233 The expression of OCN and OPN in sections of NC and CDC20sh scaffolds using IHC assay.

234 Scale bar, 50  $\mu$ m.

235

236 2- Fig 2E, indicates that the holes in tibiae of control and CKO have been drilled on  
237 opposite sides of the bone. Since the cortical thickness varies depending on the side of  
238 the tibia, it is important to generate bone defects at the exact same location for all  
239 control and CKO mice. It is also important to specify at which age these defects have  
240 been created.

241 **Response:** Thanks for reminding. As suggested, we have repeated the experiments  
242 and evaluated the position of the holes. The description has been added in the  
243 manuscript page 33 line 708 as follows.

244 “For tibial cortical bone defect, the 0.8 mm diameter holes were produced on the  
245 anterior surface of the tibiae with a round bur (Komet, Germany) conducting at 1000  
246 rpm with saline irrigation at about 2mm under the knees. These defects were  
247 conducted on 12-week-old mice, and these mice were sacrificed ten days later.”

248 Results were presented in Fig 1E, F.



249

250 **Fig 1E, F Representative micro-CT images and histomorphometric analysis of**  
251 **the regenerated bone in tibial cortical gaps**

252 (1E) Representative micro-CT images of tibial cortical bone defects in *Sp7-Cre;Cdc20<sup>fl/fl</sup>* and  
253 littermate control mice. The green lines show the position of the original defect position. The  
254 green circle represents the regenerated bone. Scale bar, 500 μm. (1F) Histomorphometric analysis  
255 of the regenerated bone in tibial cortical gaps. Results are shown as mean ± SD; (n=5);  
256 \*\*\* $p < 0.001$ .

257

258 3- Fig. 6F, 3rd lane: there is a large APC11 band, while the legend indicates no  
259 HA-APC11 overexpressed in this sample. The legend appears correct since p65  
260 protein is upregulated in this sample. The APC11 blot should show a band in the  
261 second lane, not the third lane. This implies that immunostaining of p65 and of  
262 APC11 has been done on two unrelated blots. The entire experiment should be done  
263 again using the same membrane to detect p65, APC11, CDC20 and GAPDH.

264 **Response:** Thanks for reminding. As suggested, we repeated experiments and  
265 re-presented the figure. During the experiments, we adjusted the sequences of groups  
266 and misused the former lanes. We have re-evaluated it and changed the whole figure.

**Fig 6F**



267

268 **Fig 6F Western blot analyses of p65 expression in NC or CDC20sh HEK293T**  
269 **cells after the overexpression of Vector or HA-APC11 plasmids.**

270

271 4- Fig. 7C shows robust induction of p65 ubiquitination in vitro in presence of  
272 purified CDC20 without APC11. Does this mean that APC11 is not required for  
273 CDC20-induced ubiquitination of p65?

274 **Response:** Thanks for suggestions. Among the in vitro ubiquitination assay, the  
275 substrates Flag-p65 were obtained from cell lysis, the interaction of APC11 and p65  
276 were illustrated above and APC11 existed in the system, so it can not exclude the  
277 influence of APC11 in the induction of p65 ubiquitination. Some researchers also use  
278 this method to investigate the in vitro ubiquitination, the purified GST-tagged proteins  
279 from bacterial and substrates from cells were involved (Liu *et al*, 2016; Wang *et al*,  
280 2016; Wei *et al*, 2017). In addition, we added the in vitro ubiquitination promoted by

281 GST-CDC20 or GST-CDC20 with GST-APC11. The combination of GST-CDC20  
 282 with GST-APC11 have exerted more ubiquitination of p65 than GST-CDC20 alone,  
 283 illustrating APC11 can enhance the effect of CDC20 but not required. Results were  
 284 shown in Appendix Fig S5A.



285

286 **Appendix Fig S5A Immunoblot of Flag-p65-linked in vitro ubiquitination**  
 287 **promoted by GST-CDC20 or GST-CDC20 with GST-APC11.**

288 Bacterially expressed and purified GST-CDC20 or GST-CDC20 with GST-APC11 were incubated  
 289 with purified proteins, including HA-ubiquitin, E1, E2, and Flag-p65 at 32 °C for 1 h.

290

291 5- Fig 7F, middle lane shows a strong downregulation of CDC20 protein expression  
 292 although no shRNAs against CDC20 are expressed. How do you explain this?

293 **Response:** Thanks for notification. As suggested, we re-evaluated the lanes and  
 294 repeated the experiments. We used CDC20sh HEK293T cells with high knockdown  
 295 efficiency and found the expression of CDC20 in middle lane did not decrease  
 296 compared to the first lane, and we have changed the whole figure of Fig 7F.



297

298 **Fig 7F Immunoblot of Flag-p65-linked ubiquitination promoted by HA-APC11**  
 299 **in NC and CDC20sh cells.**

300 NC or CDC20sh HEK293T cells were co-transfected with Flag-p65, His-Ubiquitin,  
 301 with or without HA-APC11 and Vector plasmids. Transfected cells were treated with  
 302 10  $\mu$ M MG132 for 6 h before collection.

303

304 6- The presentation of the results could be slightly reorganized by presenting first the  
 305 mouse model and its skeletal phenotype, and then in vitro experiments with BMDCs  
 306 (currently presented in Fig. 1). Moreover, the presentation of interaction of CDC20  
 307 and p65 both in the text and in the figures appears somewhat lengthy and could be  
 308 shortened. Finally, the results presented in fig. 6I-L could be transferred to figure 8,  
 309 since they support the conclusion that p65/NF $\kappa$ B signaling plays a role downstream of  
 310 CDC20 in osteoprogenitor differentiation.

311 **Response:** Thanks for the reminding. As suggested, we have reorganized the figure.  
312 We have changed the sequences of Fig 1 and Fig 2. The interaction of CDC20 and  
313 p65 in text has been shortened, the related figures in Fig EV4 have been transformed  
314 in Appendix Fig S4. The results presented in Fig 6I-L have been changed in Fig 8E, F  
315 and Fig 5EVF, G.

316

317 7- The protocol used to generate BMSCs is unclear.

318 **Response:** Thanks for the notification. As suggested, we have supplemented the  
319 description of generating BMSCs in page 22 line 476 as follows.

320 “Mice were sacrificed and femurs and tibiae were collected. Small cuts  
321 (approximately 1 to 2 mm) were made at both the proximal and distal ends of the  
322 bones and bone marrow was flushed into the collection tubes. Then bones were cut up  
323 and digested in collagenase type 2 and type 4 (15 mg/ml, Worthington Biochemical  
324 Corporation) for 45 min. The supernatants of the digestion were mixed together with  
325 the flushed bone marrow for centrifugation, and the cell pellets were placed into the  
326 suitable dishes. After 48 h of culture, media was removed, aspirated and non-adherent  
327 cells were discarded. The cells were digested and the cell pellets were resuspended in  
328 the volume of culture media for plating. When the BMSCs reached confluency, they  
329 were proceeded to perform differentiation (Maridas *et al*, 2018).”

330

331 Very minor additional comments:

332 1- The term "in vivo" page 5, line 108 is not appropriate since it refers to in vitro  
333 experiments.

334 **Response:** As suggested, we have corrected them in the manuscript. The term “in  
335 vivo” in page 5, line 108 has been deleted in page 8, line 171 as follows.

336 “To further investigate the important role of CDC20 in osteogenic differentiation of  
337 BMSCs, we gathered BMSCs from *Cdc20<sup>ff</sup>* control mice and *Sp7-Cre;Cdc20<sup>ff</sup>*  
338 experimental mice through flushing bone marrow and digesting bone tissues with  
339 collagenase.”

340

341 2- Page 6, line 121 the text "decreased ALP staining and activity" could be replaced  
342 by "decreased ALP staining and quantification" since the staining actually reflects  
343 ALP activity.

344 **Response:** The text “decreased ALP staining and activity” in page 6, line 121 has  
345 been changed to “decreased ALP staining and quantification” in page 9, line 184 as  
346 follows. “Moreover, the CDC20 knockdown hBMSCs showed decreased ALP  
347 staining and quantification (Fig 2E, F).”

348

349 3- The term "in vivo" page 13 line 282 may be misleading, since this is not observed  
350 in live mice but in cells cultured in vitro. This could be replaced by "in cells".

351 **Response:** The term “in vivo” in page 13 line 282 has been replaced by “in cells” in  
352 page 16 line 332 as follows.

353 “These results support p65 as a direct APC11<sup>CDC20</sup> substrate in cells and in vitro.”

354

355 Referee #2:

356

357 The authors describe a novel function of CDC20, a co-activator of the E3 ubiquitin  
358 ligase APC/C, in bone remodeling and regeneration. Whereas in vivo data to  
359 demonstrate this function were obtained by the generation and analysis of mice with  
360 Sp7-Cre-mediated CDC20 inactivation in bone-forming osteoblasts, the majority of  
361 experiments were set up to address the molecular bases explaining the deduced  
362 function of CDC20 in bone formation. Overall, this is a very complex study with  
363 strong and potentially relevant data. There are however several issues that remain to  
364 be addressed.

365

366 Specific comments:

367 1) Although the reported results are surely relevant from a basic science perspective,  
368 the statement that APC11CDC20 is a novel target for osteoporosis treatment appears  
369 too strong. Is it truly realistic to establish an agonist of such a complex cytoplasmatic  
370 regulator, whose expression is not restricted to osteoblasts?

371 **Response:** Thanks for the important points. From our results above, loss of CDC20 in  
372 osteoprogenitors impaired bone formation, overexpression of CDC20 improved the  
373 osteogenic differentiation of MSCs. Targeting APC11<sup>CDC20</sup> may influence the  
374 functions of osteoprogenitors, more evidence on its application should be investigated  
375 further. Perhaps we can change it to “Our current work clarified a cell-cycle

376 independent function of CDC20, establishing APC11<sup>CDC20</sup> as a pivotal regulator for  
377 bone formation by governing the ubiquitination and degradation of p65, and may  
378 provide a novel clue in the treatment of bone-related diseases.” in page 2, line 35.

379

380 2) The authors have to provide more information about their Sp7-Cre model, which  
381 apparently has been generated for this specific project. The key question is, if these  
382 mice represent a Cre knockin into the Sp7 locus, which might interfere with the  
383 endogenous expression of the relevant transcription factor Osterix. If this is the case,  
384 the Cdc20f/f mice alone would not be sufficient as a control, and it has to be  
385 evaluated if the Sp7-Cre mice display a skeletal phenotype, regardless of their Cdc20  
386 genotype.

387 **Response:** Thanks for the constructive points. Osterix (Osx, Sp7) is a specific  
388 transcription factor of osteoblast precursor cells and we generated *Sp7-Cre;Cdc20<sup>ff</sup>*  
389 mice to examine the role of CDC20 during osteoblast precursor differentiation and  
390 bone formation. We have added the description about the mouse model in the methods  
391 and materials in manuscript in page 23, line 493 as follows.

392 “*Cdc20<sup>ff</sup>* and *Sp7-Cre;Cdc20<sup>ff</sup>* mice were generated by Biocytogen Co., Ltd. (Beijing,  
393 China) using CRISPR/Cas9 based EGE system. Briefly, single guide RNAs (sgRNAs)  
394 targeting the upstream of exon1 and the downstream of exon7 of *Cdc20*, respectively,  
395 were designed using the CRISPR design tool (<http://www.sanger.ac.uk/htgt/wge/>).  
396 The candidate sgRNAs were screened for on-target activity using the UCA™  
397 CRISPR efficiency evaluation kit (Biocytogen Co., Ltd., Beijing, China), and two

398 sgRNAs with high specificity and on-target activity were selected. The targeting  
399 vector that contains the genomic DNA spanning exon1-7 of mouse *Cdc20* flanked by  
400 two loxP sites and the homology arms at the 5' and 3' regions were constructed as  
401 well. The targeting vector, the in vitro-synthesized sgRNAs and Cas9 mRNA were  
402 co-injected into C57BL/6N mouse zygotes. After injection, the surviving 2-cell-stage  
403 zygotes were transplanted into the KM albino pseudopregnant females. The founder  
404 mice bearing the floxed *Cdc20* allele were determined by PCR amplification and  
405 DNA sequencing. Heterozygous *Cdc20*<sup>fl/+</sup> mice were obtained by crossing the founder  
406 mice and the wild type C57BL/6N mice. The genotype of F1 heterozygous *Cdc20*<sup>fl/+</sup>  
407 mice was confirmed by PCR amplification, DNA sequencing and Southern blot  
408 analysis. *Sp7-Cre* mice were generated from Beijing Biocytogen Co., Ltd. To avoid  
409 disrupting *Sp7* expression, iCre will be inserted between the coding sequence of  
410 exon2 and 3'UTR. 2A will be used to achieve the expression of *Sp7* and iCre at the  
411 same time and level. To avoid disrupting poly (A) signal of *Sp7* and promoter region  
412 of the downstream gene *Aaas*, *Neo* cassette flanked by *frt* sites will be inserted within  
413 the non-conserved region of intron. Genotyping primers: Osx-iCre-WT-F  
414 TACCAGAAGCGACCAC-TTGAGC; iCre-Mut-R,  
415 GCACACAGACAGGAGCATCTTC. Primers were showed in Table3. The detailed  
416 information of the iB-Sp7-iCre mice was shown on this website:  
417 <https://biocytogen.com/products/cre-mouse-rat-models/b-sp7-osx-icre-mice/>. This  
418 *Sp7-Cre* (*Osx-Cre*) mouse model has been used to examine the effects of specific  
419 gene loss in osteoblast progenitor cells on bone development (Chen *et al*, 2021; Jin *et*

420 *al*, 2017). The application of this mouse model largely verifies that the Sp7-Cre  
421 transgene is able to specifically target Osx+ osteoprogenitors.”

422 Following the referee’s suggestion, we investigate the skeletal phenotype of the  
423 following groups including *Sp7-Cre*, *Cdc20<sup>ff</sup>*, *Sp7-Cre; Cdc20<sup>ff/+</sup>* and *Sp7-Cre;*  
424 *Cdc20<sup>ff</sup>*. Micro-CT analyses of the distal femur metaphysis of *Sp7-Cre; Cdc20<sup>ff</sup>* mice  
425 showed an impairment in trabecular bone micro-architecture compared to other  
426 controls. There were no significant differences among *Sp7-Cre*, *Cdc20<sup>ff</sup>*, *Sp7-Cre;*  
427 *Cdc20<sup>ff/+</sup>* phenotypes (Appendix Fig S1A). The BMD and BV/TV parameters in  
428 *Sp7-Cre;Cdc20<sup>ff</sup>* 6-week-old male mice were greatly lower than their littermates.  
429 *Sp7-Cre;Cdc20<sup>ff</sup>* mice also had decreased Tb.N, and increased Tb.Sp while there were  
430 no significant differences among other control groups (Appendix Fig S1B-E). The  
431 identification of *Sp7-Cre*, *Cdc20<sup>ff</sup>*, *Sp7-Cre; Cdc20<sup>ff/+</sup>* and *Sp7-Cre; Cdc20<sup>ff</sup>* genotypes  
432 were shown in Appendix Fig S1F.



433

434 **Appendix Fig S1A-F. Conditional knockout of Cdc20 impairs bone formation.**

435 (S1A) Representative micro-CT images of trabecular bone from the femoral metaphysis of

436 6-week-old *Sp7-Cre*, *Cdc20<sup>ff</sup>*, *Sp7-Cre;Cdc20<sup>fl/+</sup>* and *Sp7-Cre;Cdc20<sup>fl/fl</sup>* mice. Scale bar, 500  $\mu$ m.

437 (S1B-E) Histomorphometric analyses of 6-week-old femurs. Results are shown as mean  $\pm$  SD;

438 (n=3); *ns*, not significant, \*\**p*<0.01, \*\*\**p*<0.001. (S1F) Representative image of PCR genotypes

439 of *Sp7-Cre*, *Cdc20<sup>ff</sup>*, *Sp7-Cre;Cdc20<sup>fl/+</sup>* and *Sp7-Cre;Cdc20<sup>fl/fl</sup>* mice.

440

441 3) Since the in vivo findings in *Sp7-Cre/Cdc20<sup>f/f</sup>* mice are essentially the basis for the  
442 molecular experiments described thereafter, it would be important to strengthen them.  
443 In fact, there was no analysis performed to understand the cellular causes of the  
444 osteopenia. This could be done by cellular histomorphometry quantifying osteoblast  
445 and osteoclast numbers on the femur sections. Alternatively, the authors could  
446 measure serum levels of bone formation and resorption biomarkers. As presented, the  
447 phenotype description is incomplete.

448 **Response:** Thanks for suggestions. We used markers osteocalcin (OCN), Collagen  
449 Type I (COL1) to characterize osteoblasts, and Tartrate-resistant acid phosphatase  
450 (TRAP) staining to characterize osteoclasts using IHC assay (Appendix Fig S3A). We  
451 calculated the numbers of positive expression cells per perimeter of bone matrix. The  
452 measurement of osteoblasts and osteoclasts were calculated using ImageJ software  
453 and presented as N.Ob/B.Pm (osteoblast number/bone perimeter) or N.Oc/B.Pm  
454 (osteoclast number/bone perimeter) and no significant differences were seen in  
455 *Cdc20<sup>f/f</sup>* and *Sp7-Cre;Cdc20<sup>f/f</sup>* mice (Appendix Fig S3B). Additionally, the serum  
456 levels of PINP and CTX-1 were measured through Elisa assay. The results showed  
457 that the bone formation biomarker PINP decreased in *Sp7-Cre;Cdc20<sup>f/f</sup>* mice, while  
458 bone resorption marker CTX-1 did not change (Appendix Fig S3D, E). The results  
459 implied that the decreased function of osteoblasts was not due to the differences of  
460 cell numbers. Perhaps the CDC20 loss in osteoprogenitors resulting in activation of  
461 p65 may provide some evidence.



462

463 **Appendix Fig S3A, B, D, E The numbers and the expression of biomarkers of**  
 464 **osteoblasts and osteoclasts.**

465 (S3A) Immunohistochemistry of OCN and COL1, and TRAP staining of 6-week-old *Cdc20<sup>ff</sup>*,  
 466 *Sp7-Cre;Cdc20<sup>ff</sup>* mice. The arrows represent the positive expression cells. Scale bar, 50  $\mu$ m. (S3B)  
 467 Measurements and statistical analyses of numbers of osteoblasts and osteoclasts in bone sections  
 468 of *Cdc20<sup>ff</sup>* and *Sp7-Cre;Cdc20<sup>ff</sup>* mice. (n=6) (S3D, E) Measurements and statistical analyses of  
 469 PINP and CTX-1 in the serum of *Cdc20<sup>ff</sup>* and *Sp7-Cre;Cdc20<sup>ff</sup>* mice. (n=6) Results are shown as  
 470 mean  $\pm$  SD; *ns*, not significant, \**p*<0.05. N.Ob/B.Pm (osteoblast number/bone perimeter),  
 471 N.Oc/B.Pm (osteoclast number/bone perimeter).

472

473 4) The molecular experiments shown in the second part of the manuscript are overall  
474 convincing, although I personally consider the data obtained in BMCSs (now mostly  
475 shown as Supplemental Figures) as more relevant than the data obtained in HEK cells.  
476 Moreover, although some of the Western blot results are confirmed by quantitative  
477 data, many others are not. Since the authors state that all data were collected from at  
478 least three independent experiments, it should be possible to perform quantification  
479 and statistical analysis for all presented data.

480 **Response:** Thanks for notifications. In the mechanical experiments, we mainly use  
481 HEK293T cells. Lots of immunoprecipitations as well as ubiquitination experiments  
482 were involved in our research, which requires large numbers of cells and high  
483 efficiency of transfection. Compared to BMSCs, HEK293T cells are easier to  
484 transfect and are able to produce large amounts of recombinant proteins. We have  
485 verified the important experiments in BMSCs but not the whole. Therefore, we  
486 choose to show results from HEK293T in the main figure related to the mechanical  
487 experiments and we have changed the degradation of p65 by CDC20 in BMSCs to the  
488 main figure. Furthermore, we have repeated the experiments at least three times and  
489 we provide quantifications and statistical analyses of the significant differences in  
490 western blot experiments in Appendix Fig S8.



491

492 **Appendix Fig S8 Quantifications and statistical analyses of the significant**  
 493 **differences in western blot experiments.**

494 Results are shown as mean  $\pm$  SD;  $n \geq 3$ ; \* $p < 0.05$ ; \*\* $p < 0.01$ ; \*\*\* $p < 0.001$ .

495

496 5) In the last paragraph of the Results section the authors state that "..., lentiviruses

497 were distributed in mice and the expression levels of p65 was knocked down

498 according to qRT-PCR and western blot analyses." While this statement suggests that  
499 p65 expression was analyzed in vivo, the legend of Figure EV7B/C indicates that  
500 these results were obtained in BMSCs. If this means that the expression analysis was  
501 performed in ex vivo cultures, this has to be clearly stated.

502 **Response:** Thanks for reminding. As suggested, we have corrected it in page 17, line  
503 367 as follows.

504 "To clarify the efficiency of p65 knockdown in bone sections, lentivirus was  
505 distributed in mice (Fig EV5A), the expression levels of p65 in BMSCs obtained from  
506 femurs and tibiae were examined according to qRT-PCR and western blot analyses  
507 (Fig EV5B, C)."

508

509 6) Given the complexity of their findings, the authors should think about providing a  
510 schematic presentation to illustrate their conclusions.

511 **Response:** Thanks for suggestions. We have provided the schematic figure  
512 concerning about the mechanisms and the functional experiments in cells and in mice  
513 in Appendix Fig S7E. The left model shows the relationship of APC11, CDC20, p65  
514 and ubiquitin. The WD40 domain of CDC20 interacts with the RHD domain of p65,  
515 which subsequently transfers polyubiquitin to p65 inducing its degradation in a  
516 proteasome-dependent manner and promoted the osteogenesis of BMSCs through  
517 NF- $\kappa$ B pathway. APC11 is involved in this process. The right model shows the  
518 method to generate the conditional knockout mice and loss of Cdc20 in  
519 osteoprogenitors in mice results in decreased bone formation.



520

521 **Appendix Fig S7E. A model depicting how CDC20 regulates bone formation**  
 522 **through p65.**

523 The left model shows the relationship of APC11, CDC20, p65 and ubiquitin. The right model  
 524 shows the method to generate the mice and loss of Cdc20 in osteoprogenitors in mice results in  
 525 decreased bone formation.

526

527 Referee #3:

528

529 In this manuscript, Du et al. report a positive regulation of osteogenesis by the  
 530 APC/C(Cdc20) ubiquitin E3 ligase complex through modulating p65/RelA stability.

531 The authors observed a positive correlation between Cdc20 expression and  
 532 osteogenesis using both in vitro BMSC culture/differentiation models and an in vivo

533 conditional Cdc20 knockout mouse model. There is a decreased bone mass found in  
 534 Cdc20-depleted animals. The authors then sought to define the underlying mechanism,

535 they found p65 was upregulated in Cdc20-deficient BMSCs, hence hypothesized p65  
 536 as an APC(Cdc20) ubiquitin substrate. They provided evidence that p65 bound to

537 Cdc20 and that Cdc20 facilitates p65 ubiquitination. To assess the role of p65 in

538 Cdc20-mediated osteogenesis, the authors delivered p65sh lentivirus into the mice  
539 and were able to observe a rescued phenotype. This is an interesting study  
540 demonstrating a novel role of Cdc20 in osteogenesis. However, the data in their  
541 current form are quite preliminary, hence a major revision is recommended to provide  
542 strong evidence to support the conclusions. Below are specific comments that should  
543 be addressed prior to being considered for publication in EMBO Reports.

544

545 1. Cdc20 is essential for M->G1 transition, complete loss of Cdc20 arrests cell cycle  
546 in M phase and eventually causes cell death. Can the authors comment on whether the  
547 phenotypes observed are at least in part due to decreased osteoblast numbers upon  
548 *Osx/Sp7*-driven deletion of Cdc20?

549 **Response:** Thanks for the critical comments. As suggested, we used markers  
550 osteocalcin (OCN), Collagen Type I (COL1) to characterize osteoblasts using IHC  
551 assay (Appendix Fig S3A). The numbers of osteoblasts were calculated using ImageJ  
552 software and presented as N.Ob/B.Pm (osteoblast number/bone perimeter) and no  
553 significant differences were seen in *Cdc20<sup>ff</sup>* and *Sp7-Cre;Cdc20<sup>ff</sup>* mice (Appendix Fig  
554 S3B). Additionally, the EdU assay conducted on mice showed no discernable  
555 differences of proliferation ability between *Cdc20<sup>ff</sup>* and *Sp7-Cre;Cdc20<sup>ff</sup>* mice  
556 (Appendix Fig S3C). The results implied that the decreased function of osteoblasts  
557 was not due to the differences of cell numbers. Perhaps the phenotype of bone loss in  
558 *Sp7-Cre;Cdc20<sup>ff</sup>* mice was mainly due to the reduced function of osteoblasts, and the

559 CDC20 loss in osteoprogenitors resulting in activation of p65 may provide some  
560 evidence.



561

562 **Appendix Fig S3A-C. The measurements of numbers of osteoblasts and the**  
563 **proliferating cells.**

564 (S3A) Immunohistochemistry of OCN and COL1 of 6-week-old *Cdc20<sup>ff</sup>*, *Sp7-Cre; Cdc20<sup>ff</sup>* mice.

565 The arrows represent the positive expression cells. Scale bar, 50  $\mu$ m. (S3B) Measurements and

566 statistical analyses of numbers of osteoblasts in bone sections of *Cdc20<sup>ff</sup>* and *Sp7-Cre; Cdc20<sup>ff</sup>*

567 mice. (n=6) Results are shown as mean  $\pm$  SD; ns, not significant. (S3C) Immunofluorescence of

568 EdU of *Cdc20<sup>ff</sup>*, *Sp7-Cre; Cdc20<sup>ff</sup>* mice femurs. Scale bar, 50  $\mu$ m. N.Ob/B.Pm (osteoblast

569 number/bone perimeter).

570

571 2. Fig. 1H-I, can the authors comment on why the Cdc20 WD40 domain was able to

572 rescue the decreased ALP activity upon Cdc20 loss?

573 **Response:** Thanks for the points. WD40 domain of CDC20 was reported to be  
574 engaged in multiple protein-protein interactions. CDC20 appeared to bridge the  
575 interactions between APC/C and the substrates through this structure (Yu, 2007). As  
576 our results showed above, WD40 domain of CDC20 was responsible for the  
577 interaction and degradation of p65, thus influencing the osteogenesis of BMSCs.  
578 Therefore, overexpression of WD40 domain of CDC20 can rescue the decreased ALP  
579 activity and bone formation by inducing the ubiquitination of p65.

580

581 3. Fig. 2, Did the authors perform whole-mount skeleton staining of control and  
582 Sp7-cre;Cdc20(f/f) mice?

583 **Response:** Thanks for reminding. As suggested, we have performed whole-mount  
584 skeleton staining of *Cdc20<sup>ff</sup>* and *Sp7-Cre;Cdc20<sup>ff</sup>* postnatal day 2 (P2) mice. The  
585 whole skeleton, upper extremities and hind limbs were presented (Appendix Fig S2E).  
586 No significant differences were seen in the staining of skeleton.

**Fig S2E**



587

588 **Appendix Fig S2E. Whole-mount skeleton staining of *Cdc20<sup>ff</sup>* and**  
589 ***Sp7-Cre;Cdc20<sup>ff</sup>* P2 mice.**

590 The upper one shows the whole skeleton. The middle one shows the upper extremities,  
591 and the lower one shows the hind limbs of *Cdc20<sup>ff</sup>* and *Sp7-Cre;Cdc20<sup>ff</sup>* mice. Scale  
592 bar, 1cm.

593

594 Fig. 2, Have the authors tried co-staining Cdc20, p65 and an osteoblast marker using  
595 immunohistochemistry?

596 **Response:** Thanks for suggestions. Using immunochemistry methods, we found the  
597 co-localization of CDC20 and p65 on bone sections (Appendix Fig S4E). As for  
598 osteogenic markers, we chose the early and late osteoblast marker, Runt-related  
599 transcription factor 2 (RUNX2) and osteocalcin (OCN), to characterize the osteogenic  
600 ability. In conditional knockout mice, the expression of CDC20, RUNX2 and OCN  
601 decreased, while p65 expression increased (Appendix Fig S3F), suggesting that loss  
602 of CDC20 in osteoprogenitors impaired the osteogenic differentiation.

**Fig S4E**



603

604 **Appendix Fig S4E The co-localization of CDC20 and p65 on bone sections**

605 The co-localization of CDC20 and p65 on bone sections of mice. Scale bar, 50  $\mu$ m.

606

Fig S3F



607

608 **Appendix Fig S3F Immunofluorescence of relative expression of CDC20, p65,**

609 **OCN, RUNX2 of *Cdc20<sup>ff</sup>* and *Sp7-Cre;Cdc20<sup>ff</sup>* mice on bone sections.**

610 Immunofluorescence of relative expression of CDC20, p65, OCN, RUNX2 on bone sections

611 of *Cdc20<sup>ff</sup>* and *Sp7-Cre;Cdc20<sup>ff</sup>* mice. Scale bar, 20  $\mu$ m.

612

613 5. Fig. 3, Did the authors check p-p65 levels in conditions where Cdc20 is depleted?

614 **Response:** Thanks for reminding. As suggested, we used shRNA to deplete CDC20

615 and conducted western blot assay. The results showed that the expression of p-p65

616 increased in CDC20sh hBMSCs (Appendix Fig S4B).



617

618 **Appendix Fig S4B Western blot analyses of p65, p-p65 in NC and CDC20sh**

619 **hBMSCs.**

620

621 6. Fig. 3, In siCdc20 cells, was p65 mRNA affected as well?

622 **Response:** Thanks for notification. As suggested, we conducted qRT-PCR  
623 experiments in siCDC20 cells. The results showed that the expression of NF-κB  
624 pathway downstream factor, *IL-6* and *IL-8* increased, while the expression of *p65*  
625 remained stable (Appendix Fig S4A).



626

627 **Appendix Fig S4A The expression of *CDC20*, *p65* and NF-κB pathway**  
628 **downstream genes *IL-6*, *IL-8* of NC and CDC20si hBMSCs determined by**  
629 **qRT-PCR.**

630 Results are shown as mean ± SD; (n=5); ns, not significant, \*\*\*p<0.001.

631

632 7. Fig. 3 and 4, Why did the authors choose to focus on the p65/NF-κB pathway in  
633 this study? Are other NF-κB pathway proteins found increased upon Cdc20 deletion  
634 or interacted with Cdc20?

635 **Response:** Thanks for suggestions. Actually, we first found that in CDC20 deleted  
636 cells, the osteogenesis of BMSCs decreased largely, so we tried to find the pathway  
637 related to bone formation. Interestingly, we found the mRNA expression of NF-κB  
638 pathway downstream factor significantly increased in CDC20si cells. Then we sought

639 to find the key protein and we found the interaction and degradation of CDC20 on  
640 p65, so we chose to target on p65/NF- $\kappa$ B pathway. As suggested, we evaluated the  
641 interaction of other proteins in NF- $\kappa$ B pathway with CDC20. Our results illustrated  
642 that no interaction was found between CDC20 and I $\kappa$ B $\alpha$  (Appendix Fig S 4C, D).  
643 Based on the result, we clarified that the ubiquitination of p65 controlled by CDC20  
644 influenced the osteogenesis of BMSCs.



645

646 **Appendix Fig S4C, D No interaction was found between CDC20 and I $\kappa$ B $\alpha$  in**  
647 **hBMSCs.**

648

649 8. Fig. 6, APC2 is required for the integrity of APC/C complex, did the authors  
650 suggest in this study an APC2-absent but APC11-present APC/C subcomplex to  
651 catalyze p65 ubiquitination? The authors should examine known APC(Cdc20)  
652 substrates to demonstrate an effective depletion of APC2, APC11, and Cdh1.

653 **Response:** Thanks for notification. As suggested, we performed the ubiquitination  
654 assay in NC and APC2sh HEK293T cells with the overexpression of APC11, and  
655 found no significant differences of p65 ubiquitination (Appendix Fig S6A).  
656 Researches have clarified the known substrate Cyclin B1 of APC11, APC2, CDH1  
657 and other APC/C subunits (Almeida, 2012; Dimova *et al*, 2012; Pflieger *et al*, 2001).

658 Therefore, we chose Cyclin B1 as the known substrate to demonstrate the effective  
 659 depletion of APC2, APC11 and CDH1 (Appendix Fig S6B-D). Our results implied  
 660 that APC2 did not influence the ubiquitination of p65 by APC11. Some researchers  
 661 have found the ability of APC11 to catalyze substrates without APC2 (Leverson *et al*,  
 662 2000), demonstrating the catalytic ability of APC11 alone.



663

664 **Appendix Fig S6A-D Immunoblot of Flag-p65-linked ubiquitination promoted**

665 by HA-APC11 in NC and APC2sh cell and immunoblot of Cyclin B1-linked  
666 ubiquitination after the knockdown of APC2, APC11, CDH1.

667 (S6A) NC or APC2sh HEK293T cells were co-transfected with Flag-p65,  
668 His-Ubiquitin, with or without HA-APC11 and Vector plasmids. Transfected cells  
669 were treated with 10  $\mu$ M MG132 for 6 h before collection. (S6B-D) NC and APC2sh,  
670 APC11sh, CDH1sh HEK293T cells were treated with 10  $\mu$ M MG132 for 6 h, whole  
671 cell protein extracts were immunoprecipitated with anti-Cyclin B1 and  
672 immunoprecipitations were immunoblotted for Ubiquitin.

673

674 9. Fig. EV5, was Cdc20 upregulated when knocking down Cdh1?

675 **Response:** Thanks for reminding. As suggested, we used shRNA to knock down  
676 CDH1 and found no obvious change of CDC20 expression in western blot (Fig  
677 EV4F).

Fig EV4F



678

679 **Fig EV4F Western blot analyses of the expression of CDC20 in NC and CDH1sh**  
680 **HEK293T cells.**

681

682 10. Fig. 7C, bacterially expressed and purified GST-Cdc20 and GST-APC11 are  
683 APC/C-free, the authors need to explain why APC-free GST-Cdc20 and GST-APC11  
684 promote the ubiquitination of p65 in vitro.

685 **Response:** Thanks for notification. Among in vitro ubiquitination assay, the  
686 GST-tagged protein was gathered from bacterial, while FLAG-p65 was obtained from  
687 cell lysis. The interaction of APC11 and p65 were illustrated above and APC11  
688 existed in the system. The cell lysis contains the endogenous APC/C and intrigues the  
689 ubiquitination of p65. Some researchers also use this method to investigate the in vitro  
690 ubiquitination, the purified GST-tagged proteins from bacterial and substrates from  
691 cells were involved (Liu *et al*, 2016; Wang *et al*, 2016; Wei *et al*, 2017). In our results,  
692 we saw dramatic increasement of ubiquitination of p65 added with GST-CDC20 or  
693 GST-APC11, the combination of GST-CDC20 with GST-APC11 exerted more  
694 ubiquitination of p65 than GST-CDC20, suggesting both enzymes can catalyze this  
695 reaction and APC11 enhanced the ubiquitination of p65 by CDC20. Results were  
696 shown in Appendix Fig S5A.

**Fig S5A**



697

698 **Appendix Fig S5A Immunoblot of Flag-p65-linked in vitro ubiquitination**  
699 **promoted by GST-CDC20 or GST-CDC20 with GST-APC11.**

700 Bacterially expressed and purified GST-CDC20 or GST-CDC20 with GST-APC11  
701 were incubated with purified proteins, including HA-ubiquitin, E1, E2, and Flag-p65  
702 at 32 °C for 1 h.

703

704 Reference:

705 Almeida A (2012) Regulation of APC/C-Cdh1 and Its Function in Neuronal Survival. *MOL*  
706 *NEUROBIOL* 46: 547-554

707 Chen Y, Fan Q, Zhang H, Tao D, Wang Y, Yue R, Sun Y (2021) Lineage tracing of cells expressing the  
708 ciliary gene IFT140 during bone development. *Dev Dyn* 250: 574-583

709 Dimova NV, Hathaway NA, Lee BH, Kirkpatrick DS, Berkowitz ML, Gygi SP, Finley D, King RW  
710 (2012) APC/C-mediated multiple monoubiquitination provides an alternative degradation signal for  
711 cyclin B1. *Nat Cell Biol* 14: 168-176

712 Jin L, Chao L, Guo B, Wu X, Zhang G (2017) Increased PLEKHO1 within osteoblasts suppresses  
713 Smad-dependent BMP signaling to inhibit bone formation during aging. *Aging cell* 16: 360-376

714 Komori T (2006) Regulation of osteoblast differentiation by transcription factors. *J Cell Biochem* 99:  
715 1233-1239

716 Krishnamachary B, Glunde K, Wildes F, Mori N, Takagi T, Raman V, Bhujwala ZM (2009)  
717 Noninvasive detection of lentiviral-mediated choline kinase targeting in a human breast cancer  
718 xenograft. *Cancer Res* 69: 3464-3471

719 Levenson JD, Joazeiro C, Page AM, Huang HK, Hieter P, Hunter T (2000) The APC11 RING-H2

720 Finger Mediates E2-Dependent Ubiquitination. *Mol Biol Cell* 11: 2315-2325

721 Liu J, Wan L, Liu J, Yuan Z, Zhang J, Guo J, Malumbres M, Liu J, Zou W, Wei W (2016) Cdh1 inhibits  
722 WWP2-mediated ubiquitination of PTEN to suppress tumorigenesis in an APC-independent manner.  
723 *Cell Discov* 2: 15044

724 Luk S, Ng K, Zhou L, Tong M, Wong T, Yu H, Lo C, Man K, Guan X, Lee T (2020) Deficiency in  
725 embryonic stem cell marker reduced expression 1 activates mitogen-activated protein kinase kinase  
726 6-dependent p38 mitogen-activated protein kinase signaling to drive hepatocarcinogenesis. *Hepatology*  
727 72: 183-197

728 Maridas D, Rendina-Ruedy E, Le PT, Rosen CJ (2018) Isolation, Culture, and Differentiation of Bone  
729 Marrow Stromal Cells and Osteoclast Progenitors from Mice. *J VIS EXP* 2018: 131

730 Pflieger CM, Lee E, Kirschner MW (2001) Substrate recognition by the Cdc20 and Cdh1 components  
731 of the anaphase-promoting complex. *Genes Dev* 15: 2396-2407

732 Wang Y, Zhang N, Zhang L, Li R, Fu W, Ma K, Li X, Wang L, Wang J, Zhang H et al (2016)  
733 Autophagy Regulates Chromatin Ubiquitination in DNA Damage Response through Elimination of  
734 SQSTM1/p62. *Mol Cell* 63: 34-48

735 Wei X, Wang X, Zhan J, Chen Y, Fang W, Zhang L, Zhang H (2017) Smurf1 inhibits integrin activation  
736 by controlling Kindlin-2 ubiquitination and degradation. *J Cell Biol* 216: 1455-1471

737 Yu H (2007) Cdc20: a WD40 activator for a cell cycle degradation machine. *Mol cell* 27: 3-16

Dear Dr. Zhou,

Thank you for submitting your revised manuscript. It has now been seen by all of the original referees.

As you can see, the referee finds that the study is significantly improved during revision and recommends publication. However, referee #1 finds that the characterization of Sp7-iCre line is currently insufficient. We agree with referee #1 that addressing this concern would significantly strengthen the manuscript. However, being unable to address this point will not preclude from publication here.

Moreover, I need you to address the editorial points below before I can accept the manuscript.

- As per our format requirements, in the reference list, citations should be listed in alphabetical order and then chronologically, with the authors' surnames and initials inverted; where there are more than 10 authors on a paper, 10 will be listed, followed by 'et al.'. Please see <https://www.embopress.org/page/journal/14693178/authorguide#referencesformat>
- We note that Appendix Figure S7D and the panels of Appendix Figure S8 are currently not called out in the text.
- We note some irregularities in the background of p65 blot of Figure EV4G. Please provide a higher resolution image.
- We note that there are two lines intersecting the pages of Appendix Figures S4, S5, S6 and S7. Please rectify this.
- Please provide source data for Figure 6F and Appendix Fig S5A. Please see <https://www.embopress.org/page/journal/14693178/authorguide#sourcedata>
- Please upload Table 1 as 'Reagents and Tools Table' to the manuscript tracking system. Please see <https://www.embopress.org/page/journal/14693178/authorguide#textformat>
- We note that ORCID iD of Dr. Ping Zhang has not yet been linked. As of January 2016, new EMBO Press policy asks for all corresponding authors to link to their ORCID iDs. You can read about the change under "Authorship Guidelines" in the Guide to Authors here: <http://emboj.embopress.org/authorguide>

In order to link your ORCID iD to your account in our manuscript tracking system, please do the following:

1. Click the 'Modify Profile' link at the bottom of your homepage in our system.
2. On the next page you will see a box halfway down the page titled ORCID\*. Below this box is red text reading 'To Register/Link to ORCID, click here'. Please follow that link: you will be taken to ORCID where you can log in to your account (or create an account if you don't have one)
3. You will then be asked to authorise Wiley to access your ORCID information. Once you have approved the linking, you will be brought back to our manuscript system.

We regret that we cannot do this linking on your behalf for security reasons.

- I have taken the liberty of performing some minor changes in the items below. Please take a look and confirm, or feel free to make further changes.

Title: CDC20 promotes bone formation via APC/C dependent ubiquitination and degradation of p65

Synopsis: This study reveals a cell-cycle independent function of CDC20 and identifies APC11CDC20 as a positive regulator of bone formation.

Abstract:

The E3 ubiquitin ligase complex CDC20-activated Anaphase-promoting complex/Cyclosome (APC/CCDC20) plays a critical role in governing mitotic progression by targeting key cell-cycle regulators for degradation. Cell division cycle protein 20 homolog (CDC20), the co-activator of APC/C, is required for full ubiquitin ligase activity. In addition to its well-known cell-cycle related functions, we demonstrate that CDC20 plays an essential role in osteogenic commitment of bone marrow mesenchymal stromal/stem cells (BMSCs). Cdc20 conditional knockout mice exhibit decreased bone formation and impaired bone regeneration after injury. Mechanistically, we discovered a functional interaction between the WD40 domain of CDC20 and the DNA-binding domain of p65. Moreover, CDC20 promotes the ubiquitination and degradation of p65 in an APC11-dependent manner. More importantly, knockdown of p65 rescues the bone loss in Cdc20 conditional knockout mice. Our current work reveals a cell-cycle independent function of CDC20, establish APC11CDC20 as a pivotal regulator for bone formation by governing the ubiquitination and degradation of p65, and may pave the way for treatment of bone-related diseases.

- Our production/data editors have asked you to clarify several points in the figure legends (see attached document). Please incorporate these changes in the attached word document and return it with track changes activated.

Thank you again for giving us to consider your manuscript for EMBO Reports, I look forward to your minor revision.

Kind regards,

Deniz Senyilmaz Tiebe

--

Deniz Senyilmaz Tiebe, PhD  
Editor  
EMBO Reports

Referee #1:

Yangge Du and collaborators have addressed thoroughly the concerns raised and suggestions made to improve the first version of their manuscript. This revised manuscript convincingly demonstrate that CDC20 is essential for bone formation and works at least in part through the control of proteasomal degradation of P65. This finding is both novel and important, and could have additional interesting implications in other tissues.

All concerns have been adequately addressed with the exception perhaps of the lack of characterization of the Sp7-iCre mouse line used to target osteoprogenitor cells in this study. The authors provided a link to the website of Biocytogen, the company that generated this line, but the website does not provide any characterization of the line nor any published article reporting such characterization. Du and colleagues also cited two publications in which authors have used the same Sp7-iCre line (from Biocytogen). Although these studies present abnormal bone phenotypes

(like in the current study of Du and colleagues), they do not demonstrate that the Sp7-iCre transgene targets specifically osteoprogenitors and does not have off-sites effects. It would be reassuring if the authors could provide data obtained by mating Sp7-iCre mice (generated by Biocytogene) with a Rosa26-LacZ or tdTomato reporter mouse lines to demonstrate that Sp7-iCre specifically targets osteoprogenitor cells in mice.

With the exception of this specific point, the work of Du and collaborators appears extremely well done, and the data robust.

Minor point: the age of the mice and type of bones used to generate bone sections presented in supplemental figures are not always mentioned.

Referee #2:

The authors have adequately addressed all my previous comments and further improved their manuscript.

Referee #3:

In the revised manuscript, the authors significantly strengthened their data in osteogenesis assays and Cdc20-dependent regulation of p65 stability. I would recommend it for publication.

**Response to Editor and Reviewer**

Ms. Ref. No.: EMBOR-2021-52576

Title: CDC20 promotes bone formation via APC/C dependent ubiquitination and degradation of p65

Dear Prof. Deniz Senyilmaz Tiebe,

We would like to express our sincere thanks to the editors and reviewers for the points concerning our manuscript. We found the suggestions of editors and reviewers to be very helpful and of great value for improving the quality of our manuscript. We have now made a revision of the paper. All the changes are highlighted in manuscript and a detailed point-to-point response were provided. We hope that our revised manuscript and supporting information will meet the high standard of *EMBO reports*.

- As per our format requirements, in the reference list, citations should be listed in alphabetical order and then chronologically, with the authors' surnames and initials inverted; where there are more than 10 authors on a paper, 10 will be listed, followed by 'et al.'. Please see <https://www.embopress.org/page/journal/14693178/authorguide#referencesformat>

**Response:** Thanks. We have rectified the format of references according to the requirements.

- We note that Appendix Figure S7D and the panels of Appendix Figure S8 are currently not called

out in the text.

**Response:** Thanks. We have added the “Appendix Figure S7D” in page 17 line 367 as follows.

“Then we conducted H&E staining and TUNEL staining of the liver, no discernable differences were found, suggesting that apoptosis was not induced in p65sh mice (Appendix Fig S7D).”

And we have changed “Appendix Figure S8” into “Appendix Figure S8A-Q” in page 18 line 394 to present the panels as follows.

“The statistical analyses of significantly different western blot lanes were presented in Appendix Fig S8A-Q.”

- We note some irregularities in the background of p65 blot of Figure EV4G. Please provide a higher resolution image.

**Response:** Thanks. We have provided a higher resolution image of p65 blot of Figure EV4G.



- We note that there are two lines intersecting the pages of Appendix Figures S4, S5, S6 and S7.

Please rectify this.

**Response:** Thanks. We have rectified this and uploaded Appendix Figures.

- Please provide source data for Figure 6F and Appendix Fig S5A. Please see <https://www.embopress.org/page/journal/14693178/authorguide#sourcedata>

**Response:** Thanks. We have provided source data of Figure 6F and Appendix Fig S5A, and uploaded this on the system.

### Source Data



- Please upload Table 1 as 'Reagents and Tools Table' to the manuscript tracking system. Please see <https://www.embopress.org/page/journal/14693178/authorguide#textformat>

**Response:** Thanks. We have uploaded Table 1 as 'Reagents and Tools Table' to the manuscript

tracking system.

- We note that ORCID iD of Dr. Ping Zhang has not yet been linked. As of January 2016, new EMBO Press policy asks for all corresponding authors to link to their ORCID iDs. You can read about the change under "Authorship Guidelines" in the Guide to Authors here: <http://emboj.embopress.org/authorguide>

In order to link your ORCID iD to your account in our manuscript tracking system, please do the following:

1. Click the 'Modify Profile' link at the bottom of your homepage in our system.
2. On the next page you will see a box halfway down the page titled ORCID\*. Below this box is red text reading 'To Register/Link to ORCID, click here'. Please follow that link: you will be taken to ORCID where you can log in to your account (or create an account if you don't have one)
3. You will then be asked to authorise Wiley to access your ORCID information. Once you have approved the linking, you will be brought back to our manuscript system.

We regret that we cannot do this linking on your behalf for security reasons.

**Response:** Thanks. We have revised it in the system.

- I have taken the liberty of performing some minor changes in the items below. Please take a look and confirm, or feel free to make further changes.

Title: CDC20 promotes bone formation via APC/C dependent ubiquitination and degradation of p65

Synopsis: This study reveals a cell-cycle independent function of CDC20 and identifies APC11CDC20 as a positive regulator of bone formation.

Abstract:

The E3 ubiquitin ligase complex CDC20-activated Anaphase-promoting complex/Cyclosome (APC/CCDC20) plays a critical role in governing mitotic progression by targeting key cell-cycle regulators for degradation. Cell division cycle protein 20 homolog (CDC20), the co-activator of APC/C, is required for full ubiquitin ligase activity. In addition to its well-known cell-cycle related functions, we demonstrate that CDC20 plays an essential role in osteogenic commitment of bone marrow mesenchymal stromal/stem cells (BMSCs). Cdc20 conditional knockout mice exhibit decreased bone formation and impaired bone regeneration after injury. Mechanistically, we discovered a functional interaction between the WD40 domain of CDC20 and the DNA-binding domain of p65. Moreover, CDC20 promotes the ubiquitination and degradation of p65 in an APC11-dependent manner. More importantly, knockdown of p65 rescues the bone loss in Cdc20 conditional knockout mice. Our current work reveals a cell-cycle independent function of CDC20, establish APC11CDC20 as a pivotal regulator for bone formation by governing the ubiquitination and degradation of p65, and may pave the way for treatment of bone-related diseases.

**Response:** Thanks. We confirmed the minor changes and revised them in the manuscript.

- Our production/data editors have asked you to clarify several points in the figure legends (see attached document). Please incorporate these changes in the attached word document and return it with track changes activated.

**Response:** Thanks. We have changed the points in the figure legends in page 52, line 1075 as follows.

“(K) The co-localization of CDC20 and p65 in hBMSCs. Scale bar: 20  $\mu$ m.”

Referee #1:

Yangge Du and collaborators have addressed thoroughly the concerns raised and suggestions made to improve the first version of their manuscript. This revised manuscript convincingly demonstrate that CDC20 is essential for bone formation and works at least in part through the control of proteasomal degradation of P65. This finding is both novel and important, and could have additional interesting implications in other tissues.

All concerns have been adequately addressed with the exception perhaps of the lack of characterization of the Sp7-iCre mouse line used to target osteoprogenitor cells in this study. The authors provided a link to the website of Biocytogen, the company that generated this line, but the website does not provide any characterization of the line nor any published article reporting such characterization. Du and colleagues also cited two publications in which authors have used the

same Sp7-iCre line (from Biocytogen). Although these studies present abnormal bone phenotypes (like in the current study of Du and colleagues), they do not demonstrate that the Sp7-iCre transgene targets specifically osteoprogenitors and does not have off-sites effects. It would be reassuring if the authors could provide data obtained by mating Sp7-iCre mice (generated by Biocytogene) with a Rosa26-LacZ or tdTomato reporter mouse lines to demonstrate that Sp7-iCre specifically targets osteoprogenitor cells in mice.

With the exception of this specific point, the work of Du and collaborators appears extremely well done, and the data robust.

**Response:** Thanks for your suggestions. For the development of the Sp7-iCre line from Biocytogen, an F2A-iCre sequence cassette was placed between the coding sequence of exon 2 and 3'UTR of the Sp7 gene in C57BL/6 ES cells according to the link of website we provided. In this strain, Cre recombinase expression is under the control of Sp7 promoter. When crossed with a strain containing a loxP site-flanked sequence of interest, Cre-mediated recombination results in deletion of the flanked sequence in Sp7 expressing cells.

In Supplemental Figure 5 of the article entitled “Increased PLEKHO1 within osteoblasts suppresses Smad-dependent BMP signaling to inhibit bone formation during aging” published on the *Aging Cell* Journal, the ROSA26-PCAG-STOP<sup>fllox</sup>-*Smad1*-mCherry knock-in mice were intercrossed with the Sp7-iCre line from Biocytogen to generate *Osx/Smad1* mice in which *Smad1* was specifically overexpressed in osteoblasts. The representative fluorescence micrographs showing the co-localization of Smad1 (mCherry, red) + and ALP+ (green) cells at tibiae

cyosections from *Osx/Smad1* mice, suggesting that the knock-in exogenous *Smad1* gene was specifically expressed in osteoblasts. The *Smad1* mRNA levels in bone versus non-bone tissues from *Osx/Smad1* and *Osx-Cre* mice and mCherry+ cells (OBs) versus mCherry- cells (Non-OBs) from *Osx/Smad1* mice were provided, indicating the specific target of bone tissue to eliminate the off-sites effects.

The links of the article and Supplemental Figure were as follows. DOI: 10.1111/aclel.12566.

<https://pubmed.ncbi.nlm.nih.gov/28083909/>

<https://onlinelibrary.wiley.com/action/downloadSupplement?doi=10.1111%2Faclel.12566&file=aclel12566-sup-0001-SupInfo.pdf>

In the *EMBO J* article “Ubiquitin-specific protease USP34 controls osteogenic differentiation and bone formation by regulating BMP2 signaling”, the *Sp7-Cre;Usp34<sup>f/f</sup>* mice were generated from Biocytogen. In this article, the *Sp7-Cre* recombines efficiently in pre-osteoblasts and *Sp7-Cre;Usp34<sup>f/f</sup>* mice exhibited normal mendelian inheritance and growth features. The results showed that the specific deletion of *Usp34* from pre-osteoblasts resulted in low bone mass and decreased osteoblast function in mice. The DOI of this article is 10.15252/emboj.201899398.

Minor point: the age of the mice and type of bones used to generate bone sections presented in supplemental figures are not always mentioned.

**Response:** Thanks. We have added the age of mice and type of bones of bone sections in supplemental figures.

Referee #2:

The authors have adequately addressed all my previous comments and further improved their manuscript.

Referee #3:

In the revised manuscript, the authors significantly strengthened their data in osteogenesis assays and Cdc20-dependent regulation of p65 stability. I would recommend it for publication.

Dear Dr. Zhou,

Thank you for submitting your revised manuscript. I have now looked at everything and all is fine. Therefore, I am very pleased to accept your manuscript for publication in EMBO Reports.

Congratulations on a nice work!

Kind regards,

Deniz Senyilmaz Tiebe

--

Deniz Senyilmaz Tiebe, PhD  
Editor  
EMBO Reports

--

At the end of this email I include important information about how to proceed. Please ensure that you take the time to read the information and complete and return the necessary forms to allow us to publish your manuscript as quickly as possible.

As part of the EMBO publication's Transparent Editorial Process, EMBO reports publishes online a Review Process File to accompany accepted manuscripts. As you are aware, this File will be published in conjunction with your paper and will include the referee reports, your point-by-point response and all pertinent correspondence relating to the manuscript.

If you do NOT want this File to be published, please inform the editorial office within 2 days, if you have not done so already, otherwise the File will be published by default [contact: emboreports@embo.org]. If you do opt out, the Review Process File link will point to the following statement: "No Review Process File is available with this article, as the authors have chosen not to make the review process public in this case."

Should you be planning a Press Release on your article, please get in contact with emboreports@wiley.com as early as possible, in order to coordinate publication and release dates.

Thank you again for your contribution to EMBO reports and congratulations on a successful publication. Please consider us again in the future for your most exciting work.

\*\*\*\*\*

THINGS TO DO NOW:

You will receive proofs by e-mail approximately 2-3 weeks after all relevant files have been sent to our Production Office; you should return your corrections within 2 days of receiving the proofs.

Please inform us if there is likely to be any difficulty in reaching you at the above address at that time. Failure to meet our deadlines may result in a delay of publication, or publication without your

corrections.

All further communications concerning your paper should quote reference number EMBOR-2021-52576V3 and be addressed to [emboreports@wiley.com](mailto:emboreports@wiley.com).

Should you be planning a Press Release on your article, please get in contact with [emboreports@wiley.com](mailto:emboreports@wiley.com) as early as possible, in order to coordinate publication and release dates.

**YOU MUST COMPLETE ALL CELLS WITH A PINK BACKGROUND** ↓

PLEASE NOTE THAT THIS CHECKLIST WILL BE PUBLISHED ALONGSIDE YOUR PAPER

Corresponding Author Name: Yongsheng Zhou, Ping Zhang

Journal Submitted to: EMBO reports

Manuscript Number: EMBOR-2021-52576

### Reporting Checklist For Life Sciences Articles (Rev. June 2017)

This checklist is used to ensure good reporting standards and to improve the reproducibility of published results. These guidelines are consistent with the Principles and Guidelines for Reporting Preclinical Research issued by the NIH in 2014. Please follow the journal's authorship guidelines in preparing your manuscript.

#### A- Figures

##### 1. Data

The data shown in figures should satisfy the following conditions:

- the data were obtained and processed according to the field's best practice and are presented to reflect the results of the experiments in an accurate and unbiased manner.
- figure panels include only data points, measurements or observations that can be compared to each other in a scientifically meaningful way.
- graphs include clearly labeled error bars for independent experiments and sample sizes. Unless justified, error bars should not be shown for technical replicates.
- if  $n < 5$ , the individual data points from each experiment should be plotted and any statistical test employed should be justified
- Source Data should be included to report the data underlying graphs. Please follow the guidelines set out in the author ship guidelines on Data Presentation.

##### 2. Captions

Each figure caption should contain the following information, for each panel where they are relevant:

- a specification of the experimental system investigated (eg cell line, species name).
- the assay(s) and method(s) used to carry out the reported observations and measurements
- an explicit mention of the biological and chemical entity(ies) that are being measured.
- an explicit mention of the biological and chemical entity(ies) that are altered/varied/perturbed in a controlled manner.
- the exact sample size (n) for each experimental group/condition, given as a number, not a range;
- a description of the sample collection allowing the reader to understand whether the samples represent technical or biological replicates (including how many animals, litters, cultures, etc.).
- a statement of how many times the experiment shown was independently replicated in the laboratory.
- definitions of statistical methods and measures:
  - common tests, such as t-test (please specify whether paired vs. unpaired), simple  $\chi^2$  tests, Wilcoxon and Mann-Whitney tests, can be unambiguously identified by name only, but more complex techniques should be described in the methods section;
  - are tests one-sided or two-sided?
  - are there adjustments for multiple comparisons?
  - exact statistical test results, e.g., P values = x but not P values < x;
  - definition of 'center values' as median or average;
  - definition of error bars as s.d. or s.e.m.

Any descriptions too long for the figure legend should be included in the methods section and/or with the source data.

In the pink boxes below, please ensure that the answers to the following questions are reported in the manuscript itself. Every question should be answered. If the question is not relevant to your research, please write NA (non applicable). We encourage you to include a specific subsection in the methods section for statistics, reagents, animal models and human subjects.

#### B- Statistics and general methods

Please fill out these boxes ↓ (Do not worry if you cannot see all your text once you press return)

|                                                                                                                                                                                         |                                                                                                                         |
|-----------------------------------------------------------------------------------------------------------------------------------------------------------------------------------------|-------------------------------------------------------------------------------------------------------------------------|
| 1.a. How was the sample size chosen to ensure adequate power to detect a pre-specified effect size?                                                                                     | Sample size was chosen based on the standard practices in the field. We use $n = 3-6$ biological replicates.            |
| 1.b. For animal studies, include a statement about sample size estimate even if no statistical methods were used.                                                                       | Sample size was chosen based on the standard practices in the field.                                                    |
| 2. Describe inclusion/exclusion criteria if samples or animals were excluded from the analysis. Were the criteria pre-established?                                                      | There are no samples excluded from the analysis.                                                                        |
| 3. Were any steps taken to minimize the effects of subjective bias when allocating animals/samples to treatment (e.g. randomization procedure)? If yes, please describe.                | Yes. Sex and age matched mice were randomized treatment.                                                                |
| For animal studies, include a statement about randomization even if no randomization was used.                                                                                          | Animals were age and gender matched and randomly housed under standard conditions having free access to food and water. |
| 4.a. Were any steps taken to minimize the effects of subjective bias during group allocation or/and when assessing results (e.g. blinding of the investigator)? If yes please describe. | Yes, we employed blinding of the the investigator method to minimize the effects of subjective bias.                    |
| 4.b. For animal studies, include a statement about blinding even if no blinding was done                                                                                                | Animal studies were not blinded.                                                                                        |
| 5. For every figure, are statistical tests justified as appropriate?                                                                                                                    | Yes, the statistical tests used to analyze figures are justifies as appropriate.                                        |
| Do the data meet the assumptions of the tests (e.g., normal distribution)? Describe any methods used to assess it.                                                                      | All the data meet the assumptions of the tests. GraphPad Prism software v7.0 was used.                                  |
| Is there an estimate of variation within each group of data?                                                                                                                            | Yes, there is.                                                                                                          |

#### USEFUL LINKS FOR COMPLETING THIS FORM

<http://www.antibodypedia.com>  
<http://1degreebio.org>  
<http://www.equator-network.org/reporting-guidelines/improving-bioscience-research-repor>  
<http://grants.nih.gov/grants/olaw/olaw.htm>  
<http://www.mrc.ac.uk/Ourresearch/Ethicsresearchguidance/Useofanimals/index.htm>  
<http://ClinicalTrials.gov>  
<http://www.consort-statement.org>  
<http://www.consort-statement.org/checklists/view/32-consort/66-title>  
<http://www.equator-network.org/reporting-guidelines/reporting-recommendations-for-tum>  
<http://datadryad.org>  
<http://figshare.com>  
<http://www.ncbi.nlm.nih.gov/gap>  
<http://www.ebi.ac.uk/ega>  
<http://biomodels.net/>  
<http://biomodels.net/miriam/>  
<http://jij.biochem.sun.ac.za>  
[http://oba.od.nih.gov/biosecurity/biosecurity\\_documents.html](http://oba.od.nih.gov/biosecurity/biosecurity_documents.html)  
<http://www.selectagents.gov/>

|                                                                                   |             |
|-----------------------------------------------------------------------------------|-------------|
| Is the variance similar between the groups that are being statistically compared? | Yes, it is. |
|-----------------------------------------------------------------------------------|-------------|

### C- Reagents

|                                                                                                                                                                                                                                                                                                                                                                  |                                                                                                                                                                                                      |
|------------------------------------------------------------------------------------------------------------------------------------------------------------------------------------------------------------------------------------------------------------------------------------------------------------------------------------------------------------------|------------------------------------------------------------------------------------------------------------------------------------------------------------------------------------------------------|
| 6. To show that antibodies were profiled for use in the system under study (assay and species), provide a citation, catalog number and/or clone number, supplementary information or reference to an antibody validation profile. e.g., Antibodypedia ( <a href="#">see link list at top right</a> ), 1DegreeBio ( <a href="#">see link list at top right</a> ). | The antibodies used in our study were shown in Table 1 in manuscript.                                                                                                                                |
| 7. Identify the source of cell lines and report if they were recently authenticated (e.g., by STR profiling) and tested for mycoplasma contamination.                                                                                                                                                                                                            | The source of cell lines were stated in the materials and methods section (Page 22-23). None of the cell lines were authenticated. All of the cell lines were negative for mycoplasma contamination. |

\* for all hyperlinks, please see the table at the top right of the document

### D- Animal Models

|                                                                                                                                                                                                                                                                                                                                                                                                                                          |                                                                                                                                                 |
|------------------------------------------------------------------------------------------------------------------------------------------------------------------------------------------------------------------------------------------------------------------------------------------------------------------------------------------------------------------------------------------------------------------------------------------|-------------------------------------------------------------------------------------------------------------------------------------------------|
| 8. Report species, strain, gender, age of animals and genetic modification status where applicable. Please detail housing and husbandry conditions and the source of animals.                                                                                                                                                                                                                                                            | We have described the details of this information in our manuscript (Page 23-25)                                                                |
| 9. For experiments involving live vertebrates, include a statement of compliance with ethical regulations and identify the committee(s) approving the experiments.                                                                                                                                                                                                                                                                       | All animal experiments were performed in accordance with protocols approved by the Ethics Committee of Peking University Health Science Center. |
| 10. We recommend consulting the ARRIVE guidelines ( <a href="#">see link list at top right</a> ) (PLoS Biol. 8(6), e1000412, 2010) to ensure that other relevant aspects of animal studies are adequately reported. See author guidelines, under 'Reporting Guidelines'. See also: NIH ( <a href="#">see link list at top right</a> ) and MRC ( <a href="#">see link list at top right</a> ) recommendations. Please confirm compliance. | All experiments were performed in accordance with relevant guidelines and regulations.                                                          |

### E- Human Subjects

|                                                                                                                                                                                                                                                                                                                                                        |    |
|--------------------------------------------------------------------------------------------------------------------------------------------------------------------------------------------------------------------------------------------------------------------------------------------------------------------------------------------------------|----|
| 11. Identify the committee(s) approving the study protocol.                                                                                                                                                                                                                                                                                            | NA |
| 12. Include a statement confirming that informed consent was obtained from all subjects and that the experiments conformed to the principles set out in the WMA Declaration of Helsinki and the Department of Health and Human Services Belmont Report.                                                                                                | NA |
| 13. For publication of patient photos, include a statement confirming that consent to publish was obtained.                                                                                                                                                                                                                                            | NA |
| 14. Report any restrictions on the availability (and/or on the use) of human data or samples.                                                                                                                                                                                                                                                          | NA |
| 15. Report the clinical trial registration number (at ClinicalTrials.gov or equivalent), where applicable.                                                                                                                                                                                                                                             | NA |
| 16. For phase II and III randomized controlled trials, please refer to the CONSORT flow diagram ( <a href="#">see link list at top right</a> ) and submit the CONSORT checklist ( <a href="#">see link list at top right</a> ) with your submission. See author guidelines, under 'Reporting Guidelines'. Please confirm you have submitted this list. | NA |
| 17. For tumor marker prognostic studies, we recommend that you follow the REMARK reporting guidelines ( <a href="#">see link list at top right</a> ). See author guidelines, under 'Reporting Guidelines'. Please confirm you have followed these guidelines.                                                                                          | NA |

### F- Data Accessibility

|                                                                                                                                                                                                                                                                                                                                                                                                                                                                                                                                                                                                                                                                                                                                                         |    |
|---------------------------------------------------------------------------------------------------------------------------------------------------------------------------------------------------------------------------------------------------------------------------------------------------------------------------------------------------------------------------------------------------------------------------------------------------------------------------------------------------------------------------------------------------------------------------------------------------------------------------------------------------------------------------------------------------------------------------------------------------------|----|
| 18. Provide a "Data Availability" section at the end of the Materials & Methods, listing the accession codes for data generated in this study and deposited in a public database (e.g. RNA-Seq data: Gene Expression Omnibus GSE39462, Proteomics data: PRIDE PXD000208 etc.) Please refer to our author guidelines for 'Data Deposition'.<br><br>Data deposition in a public repository is mandatory for:<br>a. Protein, DNA and RNA sequences<br>b. Macromolecular structures<br>c. Crystallographic data for small molecules<br>d. Functional genomics data<br>e. Proteomics and molecular interactions                                                                                                                                              | NA |
| 19. Deposition is strongly recommended for any datasets that are central and integral to the study; please consider the journal's data policy. If no structured public repository exists for a given data type, we encourage the provision of datasets in the manuscript as a Supplementary Document (see author guidelines under 'Expanded View' or in unstructured repositories such as Dryad ( <a href="#">see link list at top right</a> ) or Figshare ( <a href="#">see link list at top right</a> ).                                                                                                                                                                                                                                              | NA |
| 20. Access to human clinical and genomic datasets should be provided with as few restrictions as possible while respecting ethical obligations to the patients and relevant medical and legal issues. If practically possible and compatible with the individual consent agreement used in the study, such data should be deposited in one of the major public access-controlled repositories such as dbGAP ( <a href="#">see link list at top right</a> ) or EGA ( <a href="#">see link list at top right</a> ).                                                                                                                                                                                                                                       | NA |
| 21. Computational models that are central and integral to a study should be shared without restrictions and provided in a machine-readable form. The relevant accession numbers or links should be provided. When possible, standardized format (SBML, CellML) should be used instead of scripts (e.g. MATLAB). Authors are strongly encouraged to follow the MIRIAM guidelines ( <a href="#">see link list at top right</a> ) and deposit their model in a public database such as Biocompare ( <a href="#">see link list at top right</a> ) or JWS Online ( <a href="#">see link list at top right</a> ). If computer source code is provided with the paper, it should be deposited in a public repository or included in supplementary information. | NA |

### G- Dual use research of concern

|                                                                                                                                                                                                                                                                                                                                   |                                                  |
|-----------------------------------------------------------------------------------------------------------------------------------------------------------------------------------------------------------------------------------------------------------------------------------------------------------------------------------|--------------------------------------------------|
| 22. Could your study fall under dual use research restrictions? Please check biosecurity documents ( <a href="#">see link list at top right</a> ) and list of select agents and toxins (APHIS/CDC) ( <a href="#">see link list at top right</a> ). According to our biosecurity guidelines, provide a statement only if it could. | The study does not have the concern of dual use. |
|-----------------------------------------------------------------------------------------------------------------------------------------------------------------------------------------------------------------------------------------------------------------------------------------------------------------------------------|--------------------------------------------------|
